## 24 **Abstract**

25 Plants undergo several developmental transitions during their life cycle. One of these, the  
26 differentiation of the young embryo from a meristem-like structure into a highly-specialized  
27 storage organ, is vital to the formation of a viable seed. For crops in which the seed itself is the  
28 end product, effective accumulation of storage compounds is of economic relevance, defining  
29 the quantity and nutritive value of the harvest yield. However, the regulatory networks  
30 underpinning the phase transition into seed filling are poorly understood. Here we show that  
31 trehalose 6-phosphate (T6P), which functions as a signal for sucrose availability in plants,  
32 mediates seed filling processes in seeds of the garden pea (*Pisum sativum*), a key grain legume.  
33 Seeds deficient in T6P are compromised in size and starch production, resembling the wrinkled  
34 seeds studied by Gregor Mendel. We show also that T6P exerts these effects by stimulating the  
35 biosynthesis of the pivotal plant hormone, auxin. We found that T6P promotes the expression  
36 of the auxin biosynthesis gene *TRYPTOPHAN AMINOTRANSFERASE RELATED2 (TAR2)*,  
37 and the resulting effect on auxin levels is required to mediate the T6P-induced activation of  
38 storage processes. Our results suggest that auxin acts downstream of T6P to facilitate seed  
39 filling, thereby providing a salient example of how a metabolic signal governs the hormonal  
40 control of an integral phase transition in a crop plant.

41

## 42 **Keywords**

43 Trehalose 6-phosphate, auxin, sugar signaling, embryo development, seed filling, starch  
44 biosynthesis, pea

45

## 46 **Introduction**

47 The transition from early patterning into seed filling is an important phase change in developing  
48 seeds, ensuring seed survival and the nourishment of seedling growth upon germination. For  
49 this reason, plants have evolved a regulatory network to control seed filling, and carbohydrates  
50 appear to play a pivotal role in this process (Weber et al., 2005; Hills, 2004). Sucrose is thought  
51 to have a dual function in developing seeds as a nutrient sugar and as a signal molecule  
52 triggering storage-associated gene expression (Weber et al., 1998). Two decades ago, the  
53 invertase control hypothesis of seed development was formulated, suggesting that seed coat-  
54 borne invertases prevent the onset of storage processes in the early embryo by cleaving the

55 incoming sucrose into hexoses (Weber et al., 1995a). When invertase activity declines, sucrose  
56 levels begin to rise and seed filling is initiated. However, relatively little is known about the  
57 perception and signaling of this metabolic switch.

58 T6P, the intermediate of trehalose biosynthesis, has been shown to be an essential signal  
59 metabolite in plants, linking growth and development to carbon metabolism (Lunn et al., 2006;  
60 Figueroa et al., 2016b). The sucrose–T6P nexus model postulates that T6P acts as a signal of  
61 sucrose availability, helping to maintain sucrose levels within a range that is appropriate for the  
62 developmental stage of the plant (Yadav et al., 2014). The particular importance of T6P for  
63 developmental transitions in plants is underlined by a growing number of growth processes  
64 known to be affected by directed modulation of T6P levels or by mutations of several T6P  
65 biosynthesis genes (Sato-Nagasawa et al., 2006; Debast et al., 2011; Wahl et al., 2013). A  
66 striking example with respect to seed development involves the mutation of TREHALOSE 6-  
67 PHOSPHATE SYNTHASE 1 (TPS1) that catalyzes the formation of T6P from glucose 6-  
68 phosphate and uridine diphosphate glucose (UDPG) in Arabidopsis (Blazquez et al., 1998).  
69 Loss of TPS1 causes embryo abortion at the point where the embryo transitions from torpedo  
70 to early cotyledon stage (Eastmond et al., 2002), while the accumulation of storage proteins and  
71 lipids is compromised (Gómez et al., 2006). This, together with the resulting rise in sucrose  
72 concentration, supports the hypothesis that T6P signals seed filling processes by adjusting the  
73 consumption of maternally-delivered sucrose.

74 The small size of Arabidopsis seeds, however, presents practical difficulties in investigating  
75 how T6P participates in the regulation of seed filling. Here, we make use of the large size of  
76 pea seeds, allowing the easy preparation and compositional analysis of individual embryos. We  
77 engineered transgenic pea plants for embryo-specific expression of T6P synthase (TPS) and  
78 T6P phosphatase (TPP) genes from *Escherichia coli*, affecting T6P content and seed filling in  
79 parallel. Our results provide genetic and biochemical evidence that T6P reports the raising  
80 sucrose status in the maturing embryo, leading to a stimulation of embryo growth and reserve  
81 starch biosynthesis. Moreover, our findings show that auxin acts as a key mediator of this  
82 process.

83

## 84 **Results**

### 85 **Cotyledon Differentiation and Starch Accumulation are Impaired by Embryo-specific** 86 **Expression of TPP**

87 To assess the potential role of T6P in the control of seed filling, we performed an initial  
88 metabolite analysis of growing pea embryos, revealing that T6P levels increased at the  
89 transition phase in parallel with sucrose and remained at high levels during the storage phase  
90 (Figure 1A). There was a positive correlation between T6P and sucrose (Pearson correlation  
91 coefficient,  $r=0.84$ ), suggesting that T6P might control the phase transition into seed filling in  
92 response to sucrose accumulation. Next, we made use of a well-established approach to  
93 manipulate T6P levels in plants (Schluepmann et al., 2003), and reduced the T6P content in  
94 developing pea embryos by heterologous expression of a bacterial TPP, encoded by the *otsB*  
95 gene from *Escherichia coli*. These transgenic *USP::TPP* lines were derived from a set of 18  
96 independent T<sub>1</sub> plants, five of which were used to establish transgene homozygotes. The  
97 expression of the *USP::TPP* transgene was confirmed by quantifying the activity of TPP and  
98 the content of T6P in the developing embryos of these lines. While no TPP activity was  
99 detectable in WT embryos, considerable activity was present in *USP::TPP* embryos  
100 (Supplemental Table 1). This led to a significant depletion of the T6P content in the transgenic  
101 embryos (Supplemental Table 1), resulting in much smaller seeds and a wrinkled seed  
102 phenotype at maturity (Figure 1B, Supplemental Table 2). Mendel's wrinkled-seed trait is  
103 associated with impaired reserve starch synthesis (Bhattacharyya et al., 1993), as was also the  
104 case for the seeds set by *USP::TPP* plants (Figure 1C), which contained 50% less starch on a  
105 per seed basis (Supplemental Table 2). At the same time, sucrose levels were elevated in  
106 transgenic embryos (Figure 1D), indicating that the sucrose-to-starch conversion was affected.  
107 Microscopic examination supported this finding, with *USP::TPP* embryos harboring  
108 considerably fewer and smaller starch granules than wild-type (WT) embryos (Figure 1E).  
109 However, altered starch accumulation only partially explains the diminished dry weight of  
110 *USP::TPP* seeds (Supplemental Table 2). Reduced cotyledon growth and smaller cell size also  
111 contribute to the decrease in dry weight (Figure 1F, Supplemental Table 3). These effects acted  
112 together to compromise the increase in embryo fresh weight at late stages of development  
113 (Figure 1G), while early embryo growth and organ determinacy were unaffected by the  
114 presence of the transgene (Supplemental Figure 1). Nuclear magnetic resonance (NMR)  
115 imaging of *USP::TPP* cotyledons revealed a substantial impairment in the formation of a spatial  
116 gradient in T<sub>2</sub> transverse relaxation time (Figure 1H). The differences between the T<sub>2</sub> signal of  
117 WT and transgenic embryos are mainly due to reduced enlargement of starch granules as well  
118 as increasing vacuolization towards the abaxial (inner) parts of the differentiating *USP::TPP*  
119 cotyledons (Van As, 2006; Borisjuk et al., 2012). Altogether, altered differentiation of  
120 *USP::TPP* embryos is in good agreement with defective cotyledon growth in the Arabidopsis

121 *tps1* mutant (Eastmond et al., 2002; Gómez et al., 2006). These results indicate that T6P is a  
122 key factor in mediating the phase transition from patterning into seed filling, with at least two  
123 major processes being influenced by T6P: the conversion of sucrose into reserve starch, and the  
124 gradual differentiation of cotyledons.

## 125 **T6P Promotes Sucrose-to-Starch Conversion by Activating Key Enzymes of Starch** 126 **Synthesis at the Transcript Level**

127 Our current understanding of starch biosynthesis in pea seeds derives from extensive studies on  
128 mutations at different *rugosus* (*r*) loci, which curtail the activity of individual starch enzymes  
129 (Supplemental Figure 2A). In an attempt to identify the enzymatic steps within the sucrose-to-  
130 starch conversion process which were regulated by T6P, we compared the metabolic changes  
131 in *USP::TPP* embryos with those elicited by *r*, *rb*, and *rug4* mutations (Bhattacharyya et al.,  
132 1990; Hylton and Smith, 1992; Craig et al., 1999). In transgenic embryos, concentrations of  
133 hexose phosphates and UDPG were consistently elevated (Supplemental Figure 2B), while only  
134 adenosine diphosphate glucose (ADPG) levels were markedly lower than in WT (Figure 2A).  
135 A similar result was obtained only in the developing *rb* embryos (Supplemental Table 4), which  
136 have impaired ADPG-pyrophosphorylase (AGP) activity (Hylton and Smith, 1992), suggesting  
137 that the reduced starch accumulation in *USP::TPP* embryos is due to a similar defect. The peak  
138 level of AGP activity in transgenic embryos never rose to the height seen in the WT embryo,  
139 remaining some 68% lower during the main storage phase (Figure 2B). This, together with a  
140 constant decrease in total phosphoglucomutase (PGM) activity (Supplemental Figure 3A),  
141 largely explains the lower starch levels during the entire storage phase. To address the question  
142 of how T6P modulates the activity of these enzymes, we initially analyzed the degree of  
143 monomerization of the AGP small subunits as an estimate of the redox activation state, but no  
144 substantial difference was detected between transgenic and WT embryos (Supplemental Table  
145 5). This is consistent with the recent finding that T6P has little or no effect on the post-  
146 translational modulation of AGP in Arabidopsis leaves (Martins et al., 2013). To establish  
147 whether any transcriptional regulation was involved, we monitored the transcript abundance of  
148 a number of genes encoding PGM and subunits of AGP, revealing that in the transgenic  
149 embryos, *PGM2*, *AGPL* (encoding the AGP large subunit), and the two small subunit encoding  
150 genes *AGPS1* and *AGPS2* were repressed (Figure 2C, Supplemental Figure 3B). The strongest  
151 reduction was recorded for *AGPL*, the transcription of which tends to peak during the period  
152 when the pea seed is most rapidly accumulating starch (Burgess et al., 1997). The loss of *AGPL*  
153 is the underlying cause for seed wrinkling in *rb* mutants (Hylton and Smith, 1992), suggesting  
154 that the wrinkled phenotype observed in *USP::TPP* seeds is due to a reduction in *AGPL*

155 expression. The implication of these results is that T6P controls the conversion of sucrose into  
156 starch, at least in part, by modulating AGP activity at the transcript level.

### 157 **Auxin Acts Downstream of T6P to Facilitate Seed Filling**

158 To uncover novel signaling components that mediate the effects of T6P on seed filling, we  
159 performed a microarray analysis of embryos harvested at either the transition or main storage  
160 phase, focusing on genes that are consistently repressed in *USP::TPP* embryos. This analysis  
161 identified *TAR2*, the expression of which was unique in being dramatically reduced (Figure  
162 3A), as a possible target of T6P. In pea, *TAR2* participates in auxin biosynthesis via the indole-  
163 3-pyruvic acid pathway, and mutation of the corresponding gene leads to reduced levels of 4-  
164 chloro-indole-3-acetic acid (4-Cl-IAA), the predominant auxin in maturing seeds (Tivendale et  
165 al., 2012). Remarkably, the *tar2-1* mutation affects the phase transition into seed filling,  
166 resulting in the formation of small, wrinkled seeds with decreased starch content and a  
167 considerably lower level of AGP activity (McAdam et al., 2017). Our finding that *USP::TPP*  
168 seeds phenocopied those of the *tar2-1* mutant, and that introduction of *USP::TPP* into a *tar2-1*  
169 background had no additional phenotypic effects beyond those of the parental lines (Table 1,  
170 experiment 1 and Figure 3B), raises the possibility that both T6P and *TAR2* act in the same  
171 signaling pathway. Measurement of the auxin content of *USP::TPP* embryos revealed a notable  
172 decrease in that of 4-Cl-IAA, by up to 70% (Figure 3C), while at the same time the content of  
173 the *TAR2*-specific substrate, 4-Cl-tryptophan, was higher than in WT embryos (Figure 3D).  
174 Together with the considerable increase of T6P in *tar2-1* embryos (Figure 3E), these results  
175 provide evidence that T6P acts as an upstream regulator of *TAR2*. As proof of this, we created  
176 hybrids between *USP::TPP* plants and transgenic plant lines harboring the *USP::TAR2*  
177 transgene, which directs expression of the *TAR2* coding sequence under the control of the  
178 embryo-specific *USP* promoter. To generate combinations of both transgenes, two previously  
179 generated *USP::TAR2* lines #3 and #5 (McAdam et al., 2017) were crossed with *USP::TPP* #2  
180 and #3 plants (Table 1, experiment 2). Segregants from these crosses were used to establish  
181 three double transgene homozygotes, referred to as *USP::TPP* #2/*USP::TAR2* #3, *USP::TPP*  
182 #3/*USP::TAR2* #3 and *USP::TPP* #3/*USP::TAR2* #5. The activity of the *USP::TAR2* transgene  
183 was able to largely restore seed size and starch content to WT levels (Table 1, experiment 2,  
184 and Figure 3F), even though the level of TPP activity was still considerable (Supplemental  
185 Table 6). Regardless of these reconstituting effects, embryos formed by the homozygous  
186 *USP::TPP/USP::TAR2* plants shared the same pale green color as those formed by *USP::TPP*  
187 plants (Figure 3G), indicating that T6P regulates developmental processes in addition to those  
188 involving the *TAR2* pathway. Taken together, our findings strongly suggest that normal



189 cotyledon growth and reserve starch accumulation are both dependent on the transcriptional  
190 activation of *TAR2* by T6P.

### 191 **Embryo-Specific Elevation of T6P Induces Auxin and Starch Biosynthesis**

192 We next investigated the effect of elevated T6P on seed filling processes by heterologously  
193 expressing *otsA*, an *Escherichia coli* gene encoding TPS, in an embryo-specific manner. To this  
194 end, five homozygous *USP::TPS* lines were generated from a set of 22 independent T<sub>1</sub> plants.  
195 Analysis of developing embryos harvested from three of these lines showed that they contained  
196 considerably more T6P than those of their sibling WT embryos (Supplemental Table 7),  
197 confirming the functional expression of the bacterial TPS. Consistent with similar experiments  
198 conducted in both *Arabidopsis* and potato (Yadav et al., 2014; Debast et al., 2011; Schlupe  
199 et al., 2003), the activity of the transgene resulted in a substantial depletion in the content of  
200 soluble sugars (Supplemental Figure 4). Short-term, induced elevation of T6P in *Arabidopsis*  
201 has been shown to induce a loss in sucrose content, due to a shift in assimilate partitioning away  
202 from sucrose in favor of organic and amino acids in the light, or inhibition of transitory starch  
203 turnover in the dark (Martins et al., 2013; Figueroa et al., 2016a). The exposure of wheat plants  
204 to cell-permeable forms of T6P has been shown to promote the size and starch content of the  
205 grain, and to raise AGP activity (Griffiths et al., 2016), an observation which ties in with the  
206 increased AGP activity (Figure 4A) in TPS expressing pea embryos. Compared to WT,  
207 expression of *TAR2* was induced in *USP::TPS* expressing embryos (Figure 4B) accompanied  
208 by an increase in 4-Cl-IAA levels at later stages (Figure 4C). It appears that the elevation of  
209 T6P has a positive influence on the sucrose-to-starch conversion by inducing AGP, and we  
210 conclude that this is mediated by a prolonged stimulation of auxin synthesis via *TAR2*. Despite  
211 these favorable changes, neither the starch content nor the size of *USP::TPS* seeds was affected  
212 (Supplemental Table 8). This may not be surprising, considering that the limits to the final size  
213 of the embryo and its capacity to accumulate dry matter are largely influenced by the maternal  
214 genotype and assimilate supply from the seed coat (Davies, 1975; Weber et al., 1996).

215

### 216 **Discussion**

217 Efficient deposition of storage compounds in seeds is a key determinant of crop yield. The  
218 interplay between carbohydrates and hormones seems to play a crucial role in the control of  
219 seed filling, but the underlying regulatory network of this process remains undefined. In this  
220 study, we provide several lines of evidence showing interaction between the signaling sugar

221 T6P and the major plant hormone auxin, as a requisite for normal seed filling in pea. We showed  
222 that T6P and sucrose levels increased in parallel at the time point when the embryo starts to  
223 build up storage products, and by manipulating the T6P content in embryos, we found that the  
224 transition into the storage mode is based on this relationship. Our results imply that T6P  
225 regulates seed filling by promoting cell differentiation and starch accumulation in the maturing  
226 embryo, thereby allowing efficient utilization of incoming sucrose. This finding is in agreement  
227 with the T6P-sucrose nexus (Yadav et al., 2014) and complements the existing view on the dual  
228 function of sucrose as a key metabolite and signaling molecule of seed filling (Weber et al.,  
229 2005; Hills, 2004), with T6P reporting the change in sucrose concentration to the regulatory  
230 network of embryo differentiation. Like in most sink organs, maturing embryos receive sucrose  
231 from the phloem and its cleavage is the initial step in the direction of storage product synthesis.  
232 However, sucrose is also required to induce storage-related gene expression causing  
233 upregulation of important enzymes like AGP (Müller-Röber et al., 1990; Weber et al., 1998).  
234 Furthermore, cell expansion in explanted *Vicia faba* embryos is triggered in response to sucrose  
235 feeding (Weber et al., 1996). The evidence presented here clearly indicate that most effects  
236 which previously have been ascribed to a signaling function of sucrose are principally  
237 controlled via a T6P-mediated pathway. We suggest that T6P connects the sucrose state with  
238 other regulatory components involved in the control of storage metabolism and embryo  
239 differentiation, such as SnF1-related protein kinase1 (Radchuk et al., 2006). This energy sensor  
240 coordinates metabolic and hormonal signals with embryo growth (Radchuk et al., 2010). In  
241 developing tissues, SnRK1 activity is inhibited by T6P in the presence of a so far  
242 uncharacterized protein (Zhang et al., 2009), and binding of T6P to the catalytic subunit  
243 (SnRK1 $\alpha$ 1) disrupts association and activation of SnRK1 by the SnRK1 activating kinase  
244 (SnAK)/Rep-Interacting Kinase1 (GRIK) protein kinases (Zhai et al., 2018).

245 Until now, the underlying mechanism by which T6P integrates carbohydrate partitioning with  
246 the hormonal control of plant development has not been apparent. Importantly, our data now  
247 indicate that auxin is a key factor in mediating the effects of T6P, which acts upstream of the  
248 pivotal auxin biosynthesis gene *TAR2* (McAdam et al., 2017) to trigger seed filling in pea. We  
249 propose that this process is mediated via a modulation of the auxin 4-Cl-IAA (Figure 5), the  
250 concentration of which increases sharply at the transition stage (Tivendale et al., 2012). There  
251 is a growing body of evidence that soluble sugars control plant growth by modifying auxin  
252 biosynthesis (LeClere et al., 2010; Sairanen et al., 2012; Lilley et al., 2012; Barbier et al., 2015).  
253 Altered sugar concentrations in endosperm-defective *miniature1* kernels of maize have been  
254 suggested to induce auxin deficiency due to the suppression of the genes *ZmTAR1* and



255 *ZmYUCCAI* (LeClere et al., 2010). Both of these genes encode proteins involved in the indole  
256 3-pyruvic acid branch of auxin biosynthesis (Won et al., 2011; Stepanova et al., 2011), with  
257 *ZmYUCCAI* being essential for the formation of a normal endosperm (Bernardi et al., 2012).  
258 Apart from seeds, a similar connection between sugars and auxin has been implicated in the  
259 control of shoot branching. Contradicting the classical theory of apical dominance (Thimann et  
260 al., 1934), the accumulation of sucrose enables the initiation of bud outgrowth after decapitation  
261 in pea (Mason et al. 2014), an effect thought to be mediated by T6P (Fichtner et al., 2017).  
262 Notably, feeding of sucrose stimulates auxin synthesis within buds and promotes sustained  
263 auxin export from bud to stem (Barbier et al, 2015). Collectively, our findings indicate that the  
264 hitherto unknown interaction between T6P and auxin might play a general role in mediating the  
265 sugar-auxin link. Of ongoing interest will be to determine how this relationship fits within the  
266 current understanding of the regulatory frameworks surrounding growth processes and  
267 developmental transitions in plants.

268

## 269 **Methods**

### 270 **Plant material**

271 Transgenic pea plants were created within the cv. ‘Erbi’, previously described for transgenic  
272 *USP::TAR2* plants (McAdam et al., 2017). The *tar2-1* mutant was made in the background of  
273 cv. ‘Cameor’ (Tivendale et al., 2012), while those carrying non WT alleles at *r*, *rb*, and *rug4*  
274 were near isogenic selections made in, respectively, germplasm accessions WL 200, WL 1685  
275 and SIM91 (John Innes Germplasm Collection, Norwich, UK) (Wang and Hedley, 1993). Plants  
276 were grown under a 16 h photoperiod provided by artificial light (550  $\mu\text{mol m}^{-2} \text{s}^{-1}$ ). The  
277 light/dark temperature regime was 19°C/16°C. The plants were fertilized once a week with  
278 0.4% Hakaphos® blau 15+10+15(+2) (Compo Expert, Münster, Germany) starting four weeks  
279 after sowing. Flowers were tagged at the time of pollination, and seeds were harvested around  
280 midday according to the number of days after pollination (DAP) which had elapsed. Embryos  
281 were excised from 2-3 seeds per pod, weighed and snap-frozen in liquid nitrogen.

282

### 283 **Transgene construction and the production of transgenic plants**

284 To generate transgenic *USP::TPS* and *USP::TPP* pea plants, coding sequences of the respective  
285 *Escherichia coli* genes *otsA* and *otsB* were PCR amplified from plasmids harboring the  
286 corresponding cDNAs. The oligonucleotides used to attach an *XbaI* restriction site to each end  
287 of the amplified coding sequences are listed in Table S9. The resulting amplicons were *XbaI*

288 restricted and ligated into the *USP::pBar* binary vector which contains an embryo-specific  
289 expression cassette based on the long version of the *USP* promoter (Zakharov et al., 2004).  
290 Selected plasmids were sequenced for validation purposes and then introduced into  
291 *Agrobacterium tumefaciens* strain EHA 105. The generation of transgenic pea plants was  
292 performed according to a modified transformation method using sections from embryo axis  
293 (Schroeder et al., 1993). For this purpose, embryo axes were excised from germinating pea  
294 seeds (3 days after imbibition), sliced longitudinally into five to seven segments with a scalpel  
295 blade, and the obtained explants were immersed in a suspension of *Agrobacteria*. After two  
296 days of cocultivation on B<sub>5</sub>h medium (Brown and Atanassov, 1985), explants were washed with  
297 sterile water and transferred to selective P1 medium (Schroeder et al., 1993) containing 10 mg  
298 L<sup>-1</sup> phosphinothricin (Duchefa, Haarlem, The Netherlands). After two weeks of callus  
299 formation, shoot growth was induced by cultivation on MS4 medium containing Murashige and  
300 Skoog macro and micronutrients (Murashige and Skoog, 1962), B5 vitamins (Gamborg et al.,  
301 1968), 4 mg L<sup>-1</sup> 6-benzylaminopurine, 2 mg L<sup>-1</sup> naphthalene acetic acid, 0.1 mg L<sup>-1</sup> indol-3-yl  
302 butyric acid, 3% (w/v) sucrose supplemented with 10 mg L<sup>-1</sup> phosphinothricin. When the  
303 developing shoots were about 5 cm in length, a substantial gain in plant growth was induced by  
304 grafting the shoots onto a WT root stock. The grafted plantlets were potted and maintained in  
305 growth chambers, where they subsequently flowered and produced seeds. Insertion and  
306 segregation of the transgenes was verified by PCR using oligonucleotides that are listed in Table  
307 S9. The allelic status at the *TAR2* locus was assessed by previously described PCR-based  
308 genotyping (Tivendale et al., 2012).

309

### 310 **Determination of sucrose, starch, total carbon and nitrogen**

311 Snap-frozen embryos were ground to powder and lyophilized at -20°C. Mature seeds were  
312 pulverized in a ball mill and the powder dried in a desiccator. To measure tissue sucrose and  
313 starch contents, the powder was extracted twice in 80% (v/v) ethanol at 60°C and the  
314 supernatants pooled and vacuum-evaporated; the residue was dissolved in sterile water. Sucrose  
315 contents were determined enzymatically (Heim et al., 1993). The starch retained in the water-  
316 insoluble fraction was solubilized in 1 M KOH and gelatinized by incubating for 1 h at 95°C,  
317 after which it was neutralized by the addition of 1 M HCl. The starch content was determined  
318 as glucose units, following its complete hydrolysis to glucose using amyloglucosidase  
319 (Rolletschek et al., 2002). The carbon and nitrogen content of powdered seed tissue was  
320 obtained using a Vario Micro Cube elemental analyser (Elementar UK Ltd., Stockport, Great  
321 Britain).

322

### 323 **Enzyme activity assays**

324 Enzyme activities were determined in growing embryos of three *USP::TPS*, five *USP::TPP*,  
325 and the corresponding WT lines each with five biological replicates per time point. The frozen,  
326 pulverized tissue was extracted in 5 vol. of 0.1 M MOPS (pH 7.4), 10 mM MgCl<sub>2</sub>, 1 mM EDTA,  
327 1 mM EGTA and 2 mM DTT; the resulting homogenates were centrifuged (10,000×g, 4°C, 5  
328 min) and the supernatants held on ice. The extracts were assayed for AGP (Weber et al., 1995b)  
329 and PGM (Manjunath et al., 1998) activity. TPP activity was determined by following the  
330 release of orthophosphate from trehalose 6-phosphate. The reaction mixtures, containing 25  
331 mM HEPES/KOH, pH 7.0, 8 mM MgCl<sub>2</sub>, 0.05 mM Triton X-100, 0.5 mM EDTA, 1.25 mM  
332 T6P, and 2 µl of crude extract in a total volume of 20 µl, were incubated for 20 min at 32°C  
333 and stopped by applying 10 µl of 0.5 M HCl. The yield of orthophosphate was determined by  
334 adding 50 µL of 1% (w/v) ammonium molybdate dissolved in 1 M H<sub>2</sub>SO<sub>4</sub> and 20 µL of 10%  
335 (w/v) ascorbic acid (Ames, 1966). After incubation at 40°C for 40 min, absorbance was  
336 immediately measured at 800 nm.

337

### 338 **AGP redox activation**

339 The redox activation of the AGP of developing embryos was determined by monitoring the  
340 degree of monomerization of small AGP subunits in non-reducing SDS gels (Hendriks et al.,  
341 2003).

342

### 343 **RNA extraction, cDNA synthesis and transcript profiling**

344 RNA was isolated from the frozen, pulverized tissue using a phenol/chloroform-based  
345 extraction method, followed by LiCl precipitation (Miranda et al., 2001). Contaminating  
346 genomic DNA was removed by incubating a 20 µg aliquot of the RNA in a 100 µL reaction  
347 containing 4 U TURBO DNA-free<sup>TM</sup> (Ambion/Life Technologies, Darmstadt, Germany),  
348 following the manufacturer's protocol. After digestion, samples were desalted and concentrated  
349 to a volume of 20 µl by using Vivaspin 500 centrifugal concentrators with a molecular weight  
350 cut-off of 30,000 Da (Sartorius, Goettingen, Germany). The absence of genomic DNA  
351 contamination was confirmed by running a quantitative real time PCR (qRT-PCR) assay  
352 directed by a primer targeting intron #8 of the pea *PHOSPHOLIPASE C (PLC)* gene (Table  
353 S9). First strand cDNA was synthesized from 4.5 µg purified RNA using SuperScript III  
354 (Invitrogen, Carlsbad, USA) primed by oligo-dT, according to the manufacturer's instructions.  
355 The reference sequence was a fragment of the pea ubiquitin-conjugating enzyme gene *E2*

356 (PSC34G03; <http://apex.ipk-gatersleben.de>), whose expression stability in the developing pea  
357 seed was evaluated using geNorm software (Vandesompele et al., 2002). Profiling of *TAR2*,  
358 *AGPL*, *APGS1*, and *AGPS2* transcripts via qRT-PCR was performed as 10  $\mu$ L reactions  
359 containing 2  $\mu$ L of each primer (0.5  $\mu$ M, sequences given in Table S9), 1  $\mu$ L cDNA (1  $\mu$ g/ $\mu$ l)  
360 and 5  $\mu$ L Power SYBR® Green-PCR Master Mix (Applied Biosystems/Life Technologies,  
361 Darmstadt, Germany): the amplification regime consisted of a 95°C/10 min denaturation step,  
362 followed by 40 cycles of 95°C/15 s, 60°C/60 s. PCR amplification efficiencies were estimated  
363 using a linear regression method implemented in the LinRegPCR program (Ramakers et al.,  
364 2003). Relative transcript abundances were calculated using the  $2^{-\Delta\Delta C_t}$  method (Livak and  
365 Schmittgen, 2001). For the qRT-PCR analysis of transgenic embryos, samples were obtained  
366 from two biological replicates per each of five *USP::TPP* and the corresponding WT lines,  
367 whereas four biological replicates each were sampled for two *USP::TPS* and the corresponding  
368 WT lines.

369

#### 370 **Microarray hybridization and analysis**

371 An 8×60K customized pea eArray (ID 045803, Agilent Technologies, Santa Clara, CA, USA)  
372 was used to scan the pea embryo transcriptome. Embryos were sampled at both 14 DAP and 22  
373 DAP from two independent *USP::TPP* transgenic lines (three independent plants per line),  
374 along with 14 DAP embryos from six WT plants and 22 DAP embryos from five WT plants.  
375 Total RNA extracts were treated with RNase-free DNase and purified using the RNeasy RNA  
376 Isolation kit (Qiagen, Germany). A 100 ng aliquot of RNA was used to generate cRNA, which  
377 was Cy3 labelled via the Low Input Quick Amp Labeling Kit (Agilent Technologies, Santa  
378 Clara, CA, USA). The labelling efficiency, amount, as well as the amount and quality of the  
379 cRNA synthesized were monitored using an ND-1000 spectrophotometer (NanoDrop  
380 Technologies, Wilmington, DE, USA) and a Bioanalyser 2100 (Agilent Technologies, Santa  
381 Clara, CA, USA). A 600 ng aliquot of labelled cRNA was used for fragmentation and array  
382 loading (Gene Expression Hybridisation Kit, Agilent Technologies). Hybridization, scanning,  
383 image evaluation, and feature extraction were achieved as described by Pielot et al., 2015. The  
384 data were evaluated with the aid of Genespring v12.5 software (Agilent Technologies) using  
385 default parameters: relative expression values were achieved after  $\log_2$  transformation, quantile  
386 normalization, and baseline transformation to the median of all samples. After removing  
387 outliers and transcripts without significant expression (absolute values  $\geq 100$ ), moderated *t*-test  
388 and false discovery rate (FDR) correction (Benjamini–Hochberg) were performed. Only  
389 features associated with a signal intensity difference of at least two fold between the WT and

390 transgenic lines at a given sampling time point were retained. A high-stringency P cutoff (P  
391 *corrected* ≤ 0.001) was used to remove random effects.

392

### 393 **Extraction and quantification of metabolites and phytohormones**

394 Metabolites (including T6P) were extracted from the frozen, pulverized embryos of three  
395 *USP::TPS* and three *USP::TPP* transgenics, along with their corresponding WT sibling plants  
396 (five embryos per genotype at each time point). The content of soluble metabolites was assessed  
397 using a high-performance anion-exchange liquid chromatography coupled to tandem mass  
398 spectrometry (LC-MS/MS) (Figuerola et al., 2016a). To estimate the content of T6P in *tar2-1*  
399 and *TAR2* embryos, freeze-dried samples were extracted (Schwender et al., 2015) followed by  
400 ion chromatography using Dionex ICS-5000+ HPIC system (Thermo Scientific, Dreieich,  
401 Germany), coupled to a QExactive Plus hybrid quadrupole-orbitrap mass spectrometer (Thermo  
402 Scientific) equipped with a heated electrospray ionization probe. Chromatographic separation  
403 was performed on Dionex™ IonPac™ 2x50 mm and 2x250 mm AS11-HC-4 μm columns  
404 equilibrated with 10 mM KOH at 0.35 ml min<sup>-1</sup> flow rate and 35°C column temperature. A  
405 linear gradient of 10–100 mM KOH was generated in 28 min followed by 2 min of column  
406 equilibration. The MS spectra were acquired using a full-scan range 67-1000 (m/z) in the  
407 negative mode at 140,000 resolving power, 200 ms maximum injection time and automated  
408 gain control at 1e6 ions. The source settings included 36 sheath gas flow rate, 5 auxiliary gas  
409 flow rate, 3.5 kV spray voltage. The capillary temperature was set to 320°C and S-lens was set  
410 to 50. Quantification was performed with external calibration using authenticated standard and  
411 TraceFinder 4.1 software package (Thermo Scientific). Auxins and 4-Cl-tryptophan were  
412 extracted from developing embryos harvested from three *USP::TPS* and three *USP::TPP*  
413 transgenic plants, and also from their corresponding sibling WT embryos, and subsequently  
414 quantified (three embryos per genotype at each time point) using ultra-performance liquid  
415 chromatography coupled with mass spectrometry (Tivendale et al., 2012).

416

### 417 **Histological and morphological analysis**

418 Seeds were sliced into two pieces and fixed at room temperature overnight in 50% (v/v) ethanol,  
419 5% (v/v) glacial acetic acid and 4% (v/v) formaldehyde. After dehydration by passing through  
420 an ethanol series, the samples were embedded in Paraplast Plus (Sigma-Aldrich, St. Louis, MO,  
421 USA). Cross sections of thickness 15 μm were mounted on poly-L-lysine-treated slides (Sigma-  
422 Aldrich) and stained with iodine in order to visualize the starch grains. The specimens were  
423 imaged by differential interference contrast (DIC) microscopy (Zeiss Axio Imager.M2), and

424 Axiovision (Zeiss, Germany) software was used for scaling; cell areas were estimated from  
425 digital images using ImageJ software ([/imagej.nih.gov/ij/](http://imagej.nih.gov/ij/)), each measurement was based on  
426 sections from three biological replicates. Early embryo growth was verified by using a VHX  
427 digital microscope (Keyence, Osaka, Japan).

428

### 429 **Nuclear magnetic resonance imaging**

430 Magnetic resonance experiments were performed by using a Bruker Avance III HD 400 MHz  
431 NMR spectrometer (Bruker BioSpin, Rheinstetten, Germany) equipped with a 1000 mT/m  
432 gradient system. For the measurement of the transverse relaxation time ( $T_2$ ) in embryonic  
433 tissues, excised pea embryos were placed in a saddle coil with an inner diameter of 10 mm. A  
434 standard Multi-Slice Multi-Echo sequence was applied in 3D (repetition time, 2500 ms; echo  
435 time, 5 ms; number of echoes, 12). The images were acquired with a resolution of 80  $\mu\text{m}$  x 90  
436  $\mu\text{m}$  x 90  $\mu\text{m}$ . The resulting datasets were processed by using the MATLAB software  
437 (MathWorks, Natick, MA, USA) with an in-house written algorithm. Calculation of the 3D  $T_2$ -  
438 maps is based on a least-squares algorithm, and the resulting  $T_2$ -maps were subsequently  
439 exported to AMIRA (FEI Visualization Sciences Group, Mérignac, France) for image  
440 processing.

441

### 442 **Data availability**

443 Microarray data reported in this study have been deposited in the ArrayExpress database at  
444 EMBL-EBI ([www.ebi.ac.uk/arrayexpress](http://www.ebi.ac.uk/arrayexpress)) under accession number E-MTAB-6659.

445

### 446 **References**

447 Ames, B. N. (1966). Assay of inorganic phosphate, total phosphate and phosphatases. *Methods*  
448 *Enzymol.* **8**:115-118.

449

450 Barbier, F., Péron, T., Lecerf, M., Perez-Garcia, M.-D., Barrière, Q., Rolčík, J., Boutet-Mercey,  
451 S., Citerne, S., Lemoine, R., Porcheron, B., Roman, H., Leduc, N., Le Gourrierec, J., Bertheloot,  
452 J., and Sakr, S. (2015). Sucrose is an early modulator of the key hormonal mechanisms  
453 controlling bud outgrowth in *Rosa hybrida*. *J. Exp. Bot.* **66**:2569-2582

454

455 Bernardi, J., Lanubile, A., Li, Q.-B., Kumar, D., Kladnik, A., Cook, S. D., Ross, J. J., Marocco,  
456 A., and Chourey, P. S. (2012). Impaired auxin biosynthesis in the defective endosperm18



457 mutant is due to mutational loss of expression in the *ZmYuc1* gene encoding endosperm-  
458 specific YUCCA1 protein in maize. *Plant Physiol.* **160**:1318-1328  
459

460 Bhattacharyya, M. K., Smith, A. M., Ellis, T. N., Hedley, C., and Martin, C. (1990). The  
461 wrinkled-seed character of pea described by Mendel is caused by a transposon-like insertion in  
462 a gene encoding starch-branching enzyme. *Cell* **60**:115-122

463 Bhattacharyya, M., Martin, C., and Smith, A., (1993). The importance of starch biosynthesis in  
464 the wrinkled seed shape character of peas studied by Mendel. *Plant Mol. Biol.* **22**:525-531  
465

466 Blazquez, M. A., Santos, E., Flores, C. L., Martínez-Zapater, J. M., Salinas, J., and Gancedo,  
467 C. (1998). Isolation and molecular characterization of the *Arabidopsis* TPS1 gene, encoding  
468 trehalose-6-phosphate synthase. *Plant J.* **13**:685-689  
469

470 Borisjuk, L., Rolletschek, H., and Neuberger T. (2012). Surveying the plant's world by  
471 magnetic resonance imaging. *Plant J.* **70**:129–146  
472

473 Brown, D. A. C., and Atanassov, A. (1985). Role of genetic background in somatic  
474 embryogenesis in *Medicago*. *Plant Cell Tissue Organ Cult.* **4**:111-122  
475

476 Burgess, D., Penton, A., Dunsmuir, P., and Dooner, H. (1997). Molecular cloning and  
477 characterization of ADP-glucose pyrophosphorylase cDNA clones isolated from pea  
478 cotyledons. *Plant Mol. Biol.* **33**:431-444  
479

480 Craig, J., Barratt, P., Tatge, H., Déjardin, A., Handley, L., Gardner, C. D., Barber, L., Wang,  
481 T., Hedley, C., Martin, C., and Smith, A. M. (1999). Mutations at the *rug4* locus alter the carbon  
482 and nitrogen metabolism of pea plants through an effect on sucrose synthase. *Plant J.* **17**:353-  
483 362  
484

485 Davies, D. R. (1975). Studies of seed development in *Pisum sativum*. *Planta* **124**:297-302  
486

487 Debast, S., Nunes-Nesi, A., Hajirezaei, M. R., Hofmann, J., Sonnewald, U., Fernie, A. R., and  
488 Börnke, F. (2011). Altering trehalose-6-phosphate content in transgenic potato tubers affects  
489 tuber growth and alters responsiveness to hormones during sprouting. *Plant Physiol.* **156**:1754-  
490 1771

491

492 Eastmond, P. J., Van Dijken, A. J. H., Spielman, M., Kerr, A., Tissier, A. F., Dickinson, H. G.,  
493 Jones, J. D. G., Smeekens, S. C., and Graham, I. A. (2002). Trehalose-6-phosphate synthase 1,  
494 which catalyses the first step in trehalose synthesis, is essential for *Arabidopsis* embryo  
495 maturation. *Plant J.* **29**:225-235

496

497 Fichtner, F., Barbier, F. F., Feil, R., Watanabe, M., Annunziata, M. G., Chabikwa, T. G.,  
498 Höfgen, R., Stitt, M., Beveridge, C. A., and Lunn, J. E. (2017). Trehalose 6-phosphate is  
499 involved in triggering axillary bud outgrowth in garden pea (*Pisum sativum* L.). *Plant J.*  
500 **92**:611–623

501

502 Figueroa, C. M., Feil, R., Ishihara, H., Watanabe, M., Kölling, K., Krause, U., Höhne, M.,  
503 Encke, B., Plaxton, W. C., Zeeman, S. C., Li, Z., Schulz, W. X., Hoefgen, R., Stitt, M., and  
504 Lunn, J. E. (2016a). Trehalose 6-phosphate coordinates organic and amino acid metabolism with  
505 carbon availability. *Plant J.* **85**:410-423

506

507 Figueroa, C. M., and Lunn, J. E. (2016b). A tale of two sugars: trehalose 6-phosphate and  
508 sucrose. *Plant Physiol.* **172**:7-27

509

510 Gamborg, O. L., Miller, R., and Ojima, K. (1968). Nutrient requirements of suspension cultures  
511 of soybean root cells. *Exp. Cell Res.* **50**:151-158

512

513 Gómez, L. D., Baud, S., Gilday, A., Li, Y., and Graham, I. A. (2006). Delayed embryo  
514 development in the *ARABIDOPSIS TREHALOSE-6-PHOSPHATE SYNTHASE 1* mutant is  
515 associated with altered cell wall structure, decreased cell division and starch accumulation.  
516 *Plant J.* **46**:69-84

517

518 Griffiths, C. A., Sagar, R., Geng, Y., Primavesi, L. F., Patel, M. K., Passarelli, M. K., Gilmore,  
519 I. S., Steven, R. T., Bunch, J., and Paul, M. J. (2016). Chemical intervention in plant sugar  
520 signalling increases yield and resilience. *Nature* **540**:574-578

521

522 Heim, U., Weber, H., Bäumlein, H., and Wobus, U. (1993). A sucrose-synthase gene of *Vicia*  
523 *faba* L.: expression pattern in developing seeds in relation to starch synthesis and metabolic  
524 regulation. *Planta* **191**:394-401

525

526 Hendriks, J. H., Kolbe, A., Gibon, Y., Stitt, M., and Geigenberger, P. (2003). ADP-glucose  
527 pyrophosphorylase is activated by posttranslational redox-modification in response to light and  
528 to sugars in leaves of *Arabidopsis* and other plant species. *Plant Physiol.* **133**:838-849

529

530 Hills, M. J. (2004). Control of storage-product synthesis in seeds. *Curr. Opin. Plant Biol.* **7**:302-  
531 308

532 Hylton, C., and Smith, A. M. (1992). The *rb* mutation of peas causes structural and regulatory  
533 changes in ADP glucose pyrophosphorylase from developing embryos. *Plant Physiol.* **99**:1626-  
534 1634

535

536 LeClere, S., Schmelz, E. A., and Chourey, P. S. (2010). Sugar levels regulate tryptophan-  
537 dependent auxin biosynthesis in developing maize kernels. *Plant Physiol.* **153**:306-318

538

539 Lilley, J. L., Gee, C. W., Sairanen, I., Ljung, K., and Nemhauser, J. L. (2012). An endogenous  
540 carbon-sensing pathway triggers increased auxin flux and hypocotyl elongation. *Plant Physiol.*  
541 **160**:2261-2270

542

543 Livak, K. J., and Schmittgen, T. D. (2001). Analysis of relative gene expression data using real-  
544 time quantitative PCR and the 2<sup>-</sup>ΔΔCT method. *Methods* **25**:402-408

545

546 Lunn, J. E., Feil, R., Hendriks, J. H. M., Gibon, Y., Morcuende, R., Osuna, D., Scheible, W.-  
547 R., Carillo, P., Hajirezaei, M.-R., and Stitt, M. (2006). Sugar-induced increases in trehalose 6-  
548 phosphate are correlated with redox activation of ADPglucose pyrophosphorylase and higher  
549 rates of starch synthesis in *Arabidopsis thaliana*. *Biochem. J.* **397**:139-148

550

551 Manjunath, S., Lee, C. H. K., Van Winkle, P., and Bailey-Serres, J. (1998). Molecular and  
552 biochemical characterization of cytosolic phosphoglucomutase in maize: expression during  
553 development and in response to oxygen deprivation. *Plant Physiol.* **117**:997-1006

554

555 Martins, M. C. M., Hejazi, M., Fettke, J., Steup, M., Feil, R., Krause, U., Arrivault, S., Vosloh,  
556 D., Figueroa, C. M., Ivakov, A., Yadav, U. P., Piques, M., Metzner, D., Stitt, M., and Lunn, J.  
557 E. (2013). Feedback inhibition of starch degradation in *Arabidopsis* leaves mediated by  
558 trehalose 6-phosphate. *Plant Physiol.* **163**:1142-1163

559

560 McAdam, E. L., Meitzel, T., Quittenden, L. J., Davidson, S. E., Dalmais, M., Bendahmane, A.  
561 I., Thompson, R., Smith, J. J., Nichols, D. S., Urquhart, S., Gélinas-Marion, A., Aubert, G., and  
562 Ross, J. J. (2017). Evidence that auxin is required for normal seed size and starch synthesis in  
563 pea. *New Phytol.* **216**:193-204

564

565 Miranda, M., Borisjuk, L., Tewes, A., Heim, U., Sauer, N., Wobus, U., and Weber, H. (2001).  
566 Amino acid permeases in developing seeds of *Vicia faba* L.: expression precedes storage protein  
567 synthesis and is regulated by amino acid supply. *Plant J.* **28**:61-71

568

569 Müller-Röber, B. T., Koßmann, J., Hannah, L. C., Willmitzer, L., and Sonnewald, U. (1990).  
570 One of two different ADP-glucose pyrophosphorylase genes from potato responds strongly to  
571 elevated levels of sucrose. *Mol. Gen. Genet.* **224**:136-146

572

573 Murashige, T., and Skoog, F. (1962). A revised medium for rapid growth and bio assays with  
574 tobacco tissue cultures. *Physiol. Plant.* **15**:473-497

575

576 Pielot, R., Kohl, S., Manz, B., Rutten, T., Weier, D., Tarkowská, D., Rolčík, J., Strnad, M.,  
577 Volke, F., and Weber, H. (2015). Hormone-mediated growth dynamics of the barley pericarp  
578 as revealed by magnetic resonance imaging and transcript profiling. *J. Exp. Bot.* **66**:6927-6943

579

580 Radchuk, R., Radchuk, V., Weschke, W., Borisjuk, L., and Weber, H. (2006). Repressing the  
581 expression of the SUCROSE NONFERMENTING-1-RELATED PROTEIN KINASE gene in  
582 pea embryo causes pleiotropic defects of maturation similar to an abscisic acid-insensitive  
583 phenotype. *Plant Physiol.* **140**:263-278

584

585 Radchuk, R., Emery, R. J. N., Weier, D., Vigeolas, H., Geigenberger, P., Lunn, J. E., Feil, R.,  
586 Weschke, W., and Weber, H. (2010). Sucrose non-fermenting kinase 1 (SnRK1) coordinates  
587 metabolic and hormonal signals during pea cotyledon growth and differentiation. *Plant J.*  
588 **61**:324-338

589

590 Ramakers, C., Ruijter, J. M., Deprez, R. H. L., and Moorman, A. F. (2003). Assumption-free  
591 analysis of quantitative real-time polymerase chain reaction (PCR) data. *Neurosci. Lett.* **339**:62-

592 66

593  
594  
595  
596  
597  
598  
599  
600  
601  
602  
603  
604  
605  
606  
607  
608  
609  
610  
611  
612  
613  
614  
615  
616  
617  
618  
619  
620  
621  
622  
623  
624  
625

Rolletschek, H., Hajirezaei, M.-R., Wobus, U., and Weber, H. (2002). Antisense-inhibition of ADP-glucose pyrophosphorylase in *Vicia narbonensis* seeds increases soluble sugars and leads to higher water and nitrogen uptake. *Planta* **214**:954-964

Sairanen, I., Novák, O., Pěňčík, A., Ikeda, Y., Jones, B., Sandberg, G., and Ljung, K. (2012). Soluble carbohydrates regulate auxin biosynthesis via PIF proteins in *Arabidopsis*. *Plant Cell* **24**:4907-4916

Satoh-Nagasawa, N., Nagasawa, N., Malcomber, S., Sakai, H., and Jackson, D. (2006). A trehalose metabolic enzyme controls inflorescence architecture in maize. *Nature* **441**:227-230

Schluepmann, H., Pellny, T., van Dijken, A., Smeekens, S., and Paul, M. (2003). Trehalose 6-phosphate is indispensable for carbohydrate utilization and growth in *Arabidopsis thaliana*. *Proc. Natl. Acad. Sci. U.S.A.* **100**:6849-6854

Schroeder, H. E., Schotz, A. H., Wardley-Richardson, T., Spencer, D., and Higgins, T. J. (1993). Transformation and regeneration of two cultivars of pea (*Pisum sativum* L.). *Plant Physiol.* **101**:751-757

Schwender, J., Hebbelmann, I., Heinzl, N., Hildebrandt, T., Rogers, A., Naik, D., Klapperstück, M., Braun, H.-P., Schreiber, F., Denolf, P., Borisjuk, L., and Rolletschek H. (2015). Quantitative multilevel analysis of central metabolism in developing oilseeds of oilseed rape during in vitro culture. *Plant Physiol.* **168**:828-848

Stepanova, A. N., Yun, J., Robles, L. M., Novak, O., He, W., Guo, H., Ljung, K, and Alonso, J. M. (2011). The *Arabidopsis* YUCCA1 flavin monooxygenase functions in the indole-3-pyruvic acid branch of auxin biosynthesis. *Plant Cell* **23**:3961-3973

Thimann, K. V., Skoog, F., and Kerckhoff, W.G. (1934). On the inhibition of bud development and other functions of growth substance in *Vicia faba*. *Proc. R. Soc. Lond. Ser. B-Biol. Sci.* **114**:317-339

- 626 Tivendale, N. D., Davidson, S. E., Davies, N. W., Smith, J. A., Dalmais, M., Bendahmane, A.  
627 I., Quittenden, L. J., Sutton, L., Bala, R. K., Le Signor, C., Thompson, R., Horne, J., Reid, J.  
628 B., and Ross, J. J. (2012). Biosynthesis of the halogenated auxin, 4-chloroindole-3-acetic acid.  
629 *Plant Physiol.* **159**:1055-1063
- 630
- 631 Van As, H. (2006). Intact plant MRI for the study of cell water relations, membrane  
632 permeability, cell-to-cell and long distance water transport. *J. Exp. Bot.* **58**:743-756
- 633
- 634 Vandesompele, J., De Preter, K., Pattyn, F., Poppe, B., Van Roy, N., De Paepe, A., and  
635 Speleman, F., (2002). Accurate normalization of real-time quantitative RT-PCR data by  
636 geometric averaging of multiple internal control genes. *Genome Biol.* **3**:research0034. 0031
- 637
- 638 Wahl, V., Ponnu, J., Schlereth, A., Arrivault, S., Langenecker, T., Franke, A., Feil, R., Lunn,  
639 J. E., Stitt, M., and Schmid, M. (2013). Regulation of flowering by trehalose-6-phosphate  
640 signaling in *Arabidopsis thaliana*. *Science* **339**:704-707
- 641
- 642 Wang, T. L., and Hedley, C. L. (1993). Seed mutants in *Pisum*. *Pisum Genet.* **25**:64–70
- 643
- 644 Weber, H., Borisjuk, L., Heim, U., Buchner, P., and Wobus, U. (1995a). Seed coat-associated  
645 invertases of fava bean control both unloading and storage functions: cloning of cDNAs and  
646 cell type-specific expression. *Plant Cell* **7**:1835-1846
- 647
- 648 Weber, H., Heim, U., Borisjuk, L., and Wobus, U. (1995b). Cell-type specific, coordinate  
649 expression of two ADP-glucose pyrophosphorylase genes in relation to starch biosynthesis  
650 during seed development of *Vicia faba* L. *Planta* **195**: 352-361
- 651
- 652 Weber, H., Borisjuk, L., and Wobus, U. (1996). Controlling seed development and seed size in  
653 *Vicia faba*: a role for seed coat-associated invertases and carbohydrate state. *Plant J.* **10**:823-  
654 834
- 655
- 656 Weber, H., Heim, U., Golombek, S., Borisjuk, L., Manteuffel, U., and Wobus, U. (1998).  
657 Expression of a yeast-derived invertase in developing cotyledons of *Vicia narbonensis* alters  
658 the carbohydrate state and affects storage functions. *Plant J.* **16**: 163-172



659

660 Weber, H., Borisjuk, L., and Wobus, U. (2005). Molecular physiology of legume seed  
661 development. *Annu. Rev. Plant Biol.* **56**:253-279

662

663 Won, C., Shen, X., Mashiguchi, K., Zheng, Z., Dai, X., Cheng, Y., Kasahara, H., Kamiya, Y.,  
664 Chory, J., and Zhao, Y. (2011). Conversion of tryptophan to indole-3-acetic acid by  
665 TRYPTOPHAN AMINOTRANSFERASES OF *ARABIDOPSIS* and YUCCAs in *Arabidopsis*.  
666 *Proc. Natl Acad. Sci. U.S.A.* **108**:18518-18523

667

668 Yadav, U. P., Ivakov, A., Feil, R., Duan, G. Y., Walther, D., Giavalisco, P., Piques, M., Carillo,  
669 P., Hubberten, H.-M., Stitt, M., and Lunn, J. E. (2014). The sucrose–trehalose 6-phosphate  
670 (Tre6P) nexus: specificity and mechanisms of sucrose signalling by Tre6P. *J. Exp. Bot.*  
671 **65**:1051-1068

672

673 Zhai, Z., Keereetawee, J., Liu, H., Feil, R., Lunn, J.E., and Shanklin, J. (2018). Trehalose 6-  
674 Phosphate Positively Regulates Fatty Acid Synthesis by Stabilizing WRINKLED1. *Plant Cell*  
675 **30**:2616-2627

676

677 Zhang, Y., Primavesi, L. F., Jhurreea, D., Andralojc, P. J., Mitchell, R. A. C., Powers, S. J.,  
678 Schluepmann, H., Delatte, T., Wingler, A., and Paul M. J. (2009). Inhibition of SNF1-related  
679 protein kinase1 activity and regulation of metabolic pathways by trehalose-6-phosphate. *Plant*  
680 *Physiol.* **149**:1860-1871

681

682 Zakharov, A., Giersberg, M., Hosein, F., Melzer, M., Müntz, K., and Saalbach, I. (2004). Seed-  
683 specific promoters direct gene expression in non-seed tissue. *J. Exp. Bot.* **55**:1463-1471

684

685

## 686 **Acknowledgments**

687 We are grateful to Angela Schwarz, Elsa Fessel, Angela Stegmann and Katrin Blaschek for  
688 excellent technical assistance, and Noel Davies and David Nichols (Central Science Laboratory,  
689 University of Tasmania) for assistance with auxin analyses. We thank Mike Ambrose (John  
690 Innes Centre) for providing seeds, and Marion Dalmais, Richard Thompson, and co-workers  
691 (INRA, centre de Dijon) for isolating the *tar2-1* mutant. We also thank Bruno Müller, Hans

692 Weber, and Winfriede Weschke for discussions and continuous support. This work was  
693 supported by Deutsche Forschungsgemeinschaft grants WE1641/16-1, GE878/5-2, and  
694 GE878/8-1.

695

#### 696 **Author Contributions**

697 T.M. directed the overall study design and performed enzyme activity measurements,  
698 microscopy, transcript profiling, compositional analysis of seeds, molecular cloning, plant  
699 transformation, cross breeding and genotyping. A.H., R.F., and J.E.L. conducted the LC-MS-  
700 based profiling of metabolites. I.T. and P.G. analysed the redox status of AGP. Microarray  
701 experiments were performed and analysed by R.R.. E.L.M. and J.J.R. performed the  
702 measurement of hormones. Nuclear magnetic resonance images were generated by E.M. and  
703 L.B.. T.M. wrote the paper, on which all authors commented.

704

705

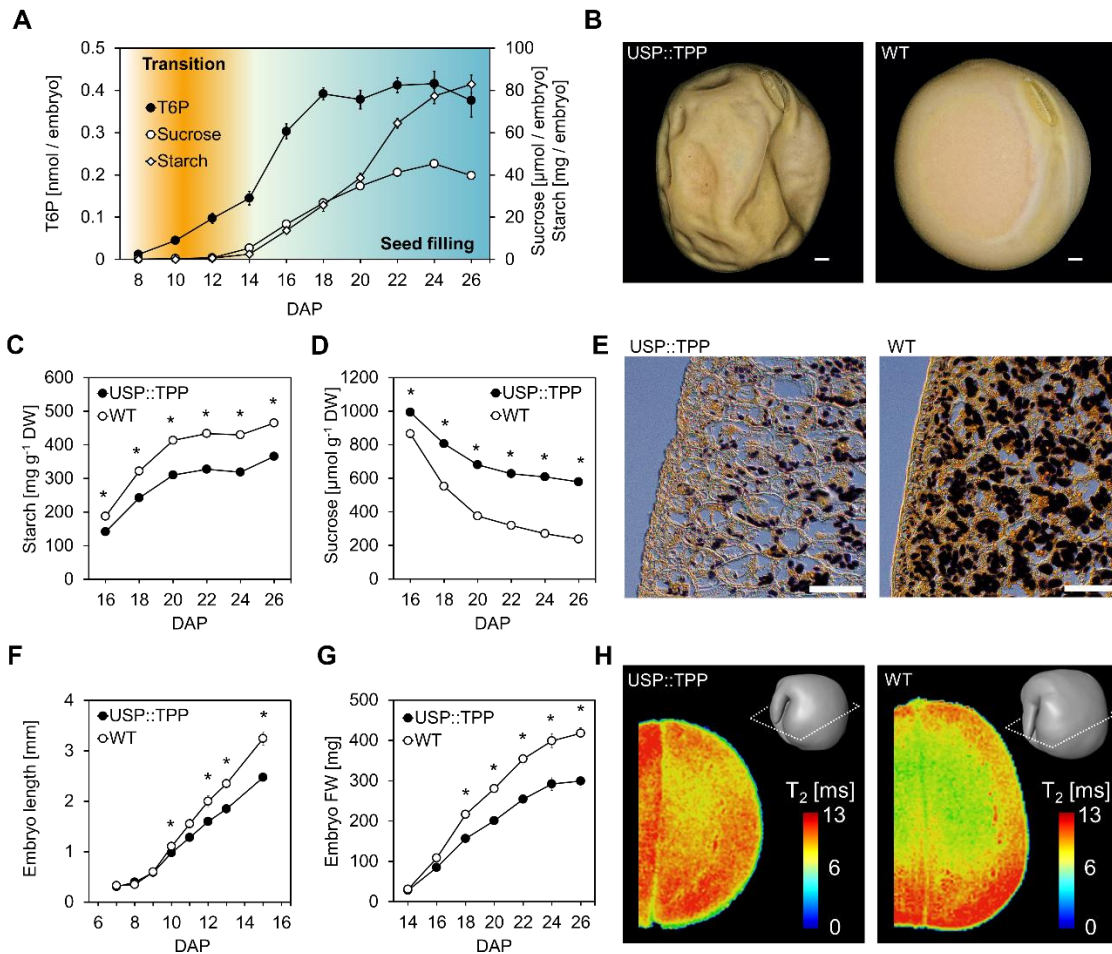

706

707 **Figure 1.** T6P promotes reserve starch accumulation and cotyledon differentiation in pea. (A)  
708 The relationship between the level of T6P and the accumulation of sucrose and starch in wild-  
709 type (WT) embryos over a period from 8 to 28 days after pollination (DAP). The error bars  
710 indicate the SEM ( $n=5$ ). (B) The appearance of mature seeds formed by *USP::TPP* #3 and the  
711 corresponding WT plants. Scale bar, 1 cm. (C, D) Starch (C) and sucrose (D) levels in growing  
712 *USP::TPP* and WT embryos. Error bars indicate SEM ( $n=25$ ), \*  $P \leq 0.001$  (Student's  $t$ -test).  
713 (E) Iodine staining of starch granules in 22-day-old embryos harvested from *USP::TPP* #3  
714 plants and corresponding WT plants. Scale bars, 500  $\mu$ m. (F, G) Length (F) and fresh weight  
715 (G) of developing *USP::TPP* and WT embryos. Values given as means  $\pm$  SEM (f:  $n=5$ , g:  
716  $n=25$ ), \*  $P \leq 0.05$  (Student's  $t$ -test). (H) Quantitative NMR imaging of transverse relaxation  
717 time ( $T_2$ ) in living *USP::TPP* #3 and WT cotyledons at 26 DAP. The 3D-scheme on the right  
718 indicates the virtual cross-section plane used for visualization.  $T_2$  values are color-coded.

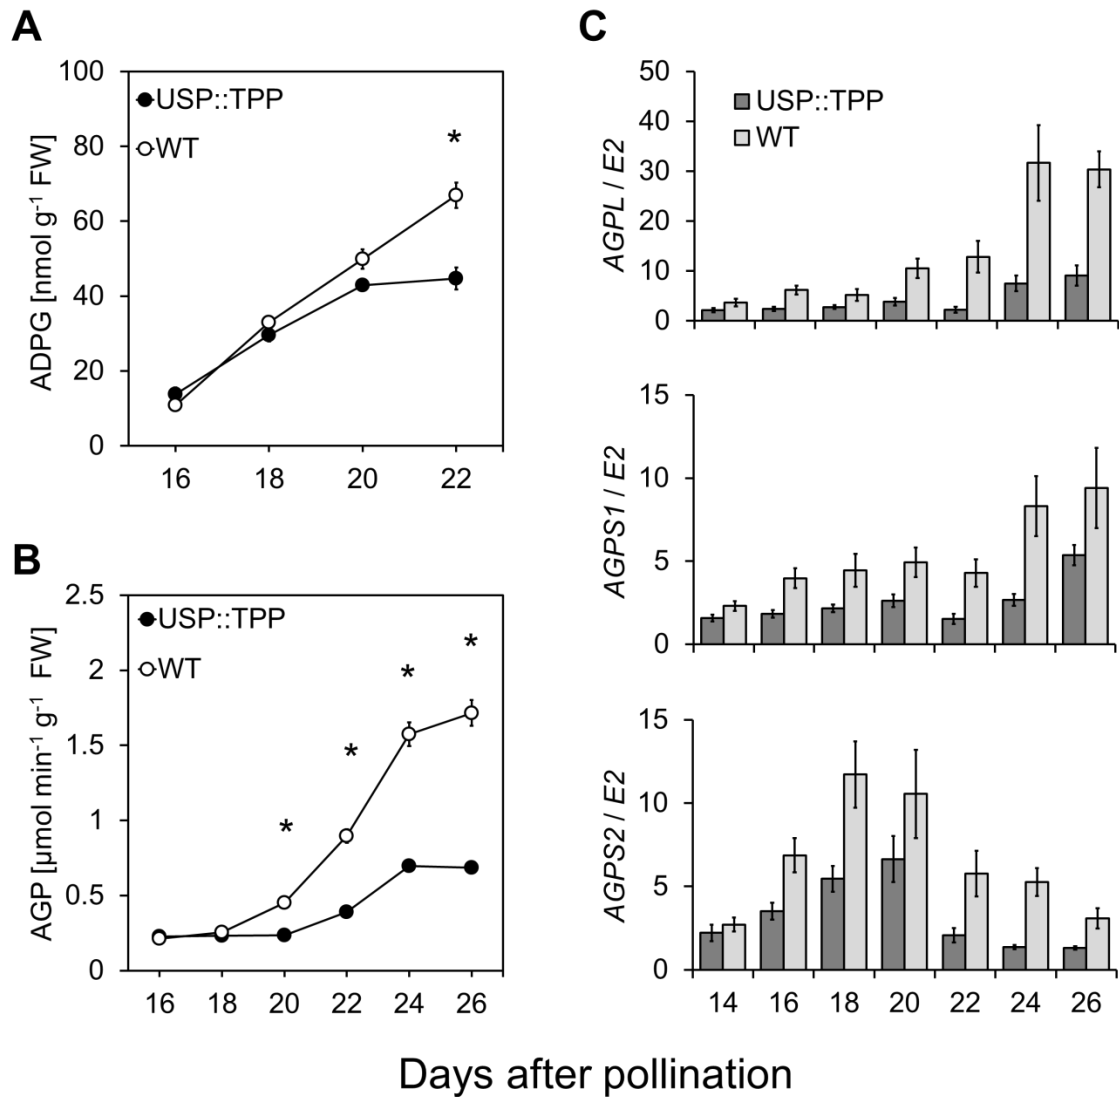

719

720 **Figure 2.** The effect of heterologous TPP expression on AGP activity and transcript levels of  
721 the corresponding genes. (A, B) The levels of ADPG (A) and AGP activity (B) in maturing  
722 *USP::TPP* and WT embryos. Values are means  $\pm$  SEM ( $n=25$ ), \*  $P \leq 0.001$  (Student's *t*-test).  
723 (C) Relative abundance of *AGPL*, *AGPS1* and *AGPS2* transcripts in *USP::TPP* and WT  
724 embryos over a period from 14 to 26 DAP. Values given as means  $\pm$  SEM ( $n=10$ ).

725

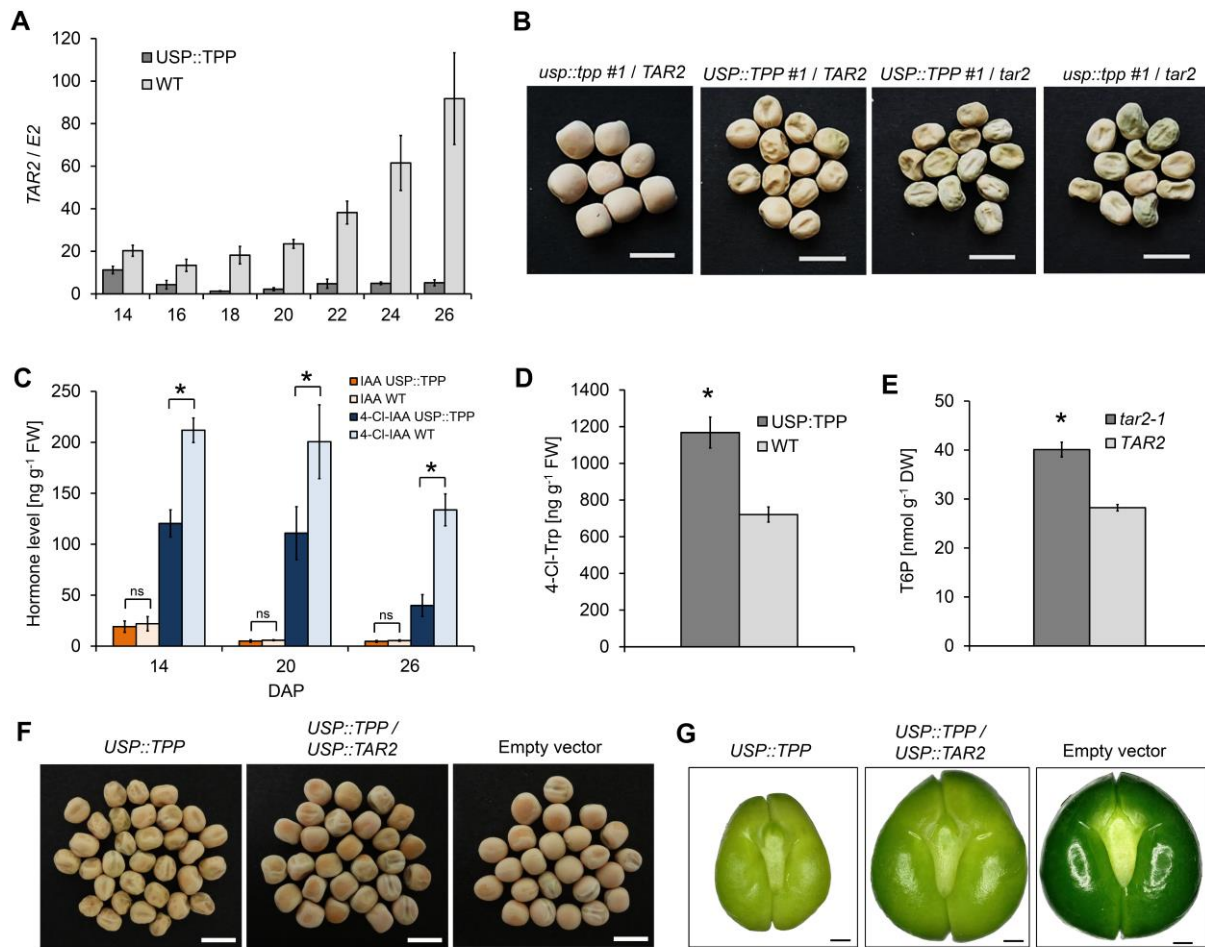

726

727 **Figure 3.** Expression of TPP affects auxin synthesis in developing pea embryos. (A) Relative  
728 abundance of *TAR2* transcripts in 14 to 26-day-old *USP::TPP* and WT embryos. Error bars  
729 denote upper and lower limit of SEM ( $n=10$ ). (B) The photographs show dry seeds harvested  
730 from *usp::tpp #1 / TAR2*, *USP::TPP #1 / TAR2*, *USP::TPP #1 / tar2-1*, and *usp::tpp #1 / tar2-*  
731 *1* plants. Scale bar, 1 cm. (C) Auxin levels in growing *USP::TPP* and WT embryos. Values are  
732 means  $\pm$  SEM ( $n=9$ ), \*  $P \leq 0.05$  (Student's *t*-test), ns, not significant. (D) Levels of 4-Cl-  
733 tryptophan (4-Cl-Trp) in 26-day-old *USP::TPP* and WT embryos. Values are means  $\pm$  SEM  
734 ( $n=9$ ). Significant difference according to Student's *t*-test: \* $P \leq 0.05$ . (E) The content of T6P  
735 in 22-day old *tar2-1* and WT embryos. Values are means  $\pm$  SEM ( $n=6$ ), \*  $P \leq 0.001$  (Student's  
736 *t*-test) (F) The seed phenotype of hybrids between *USP::TPP* and *USP::TAR2* plants. The  
737 photographs present dry seeds from plants harboring *USP::TPP#3*,  
738 *USP::TPP#3/USP::TAR2#3*, and the empty vector control. Scale bars, 1 cm. (G) The  
739 appearance of 22-day-old embryos developing on *USP::TPP #3*, *USP::TPP #3/USP::TAR2 #3*,  
740 and empty vector plants. Scale bars, 1 mm.

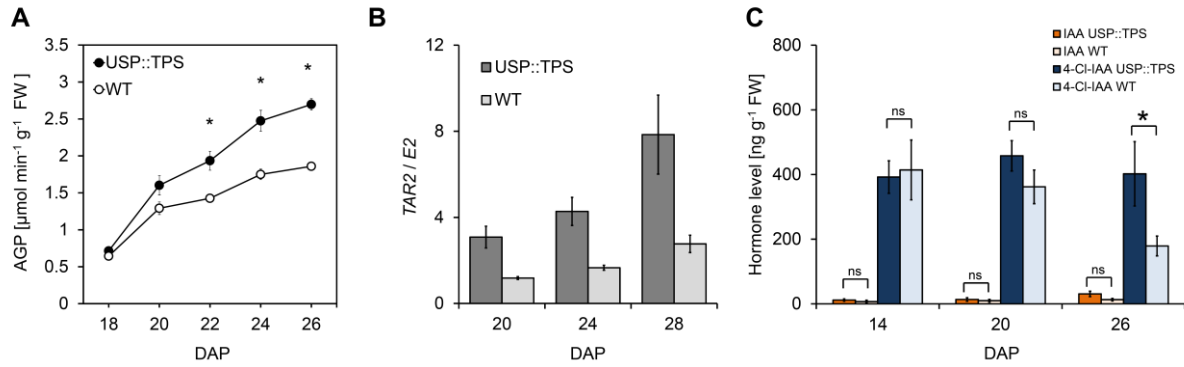

741

742 **Figure 4.** Expression of TPS induces starch and auxin synthesis in developing pea embryos.  
 743 (A) The level of AGP activity in 18- to 26-day-old *USP::TPS* and WT embryos ( $n=15$ ), \*  $P \leq$   
 744 0.05 (Student's  $t$ -test). (B) Relative transcript levels of *TAR2* in embryos formed by *USP::TPS*  
 745 and corresponding WT plants. Transcript abundances are means  $\pm$  SEM ( $n=8$ ). (C) Auxin  
 746 accumulation in growing *USP::TPS* and WT embryos. Values are means  $\pm$  SEM ( $n=9$ ),\*  $P \leq$   
 747 0.05 (Student's  $t$ -test), ns; not significant.



748

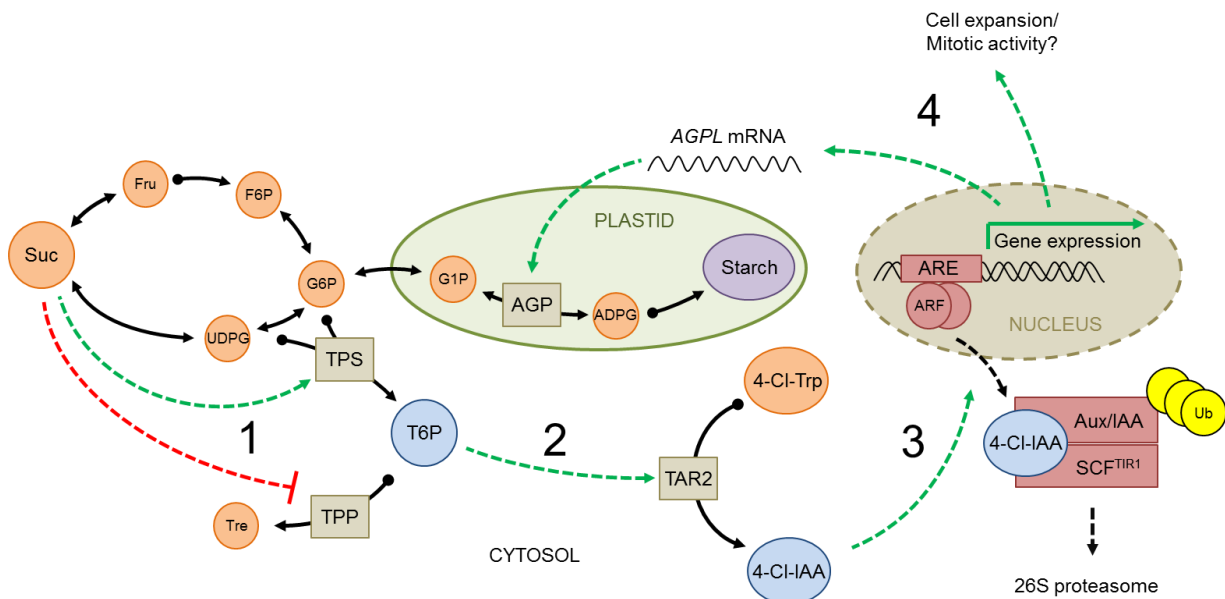

749

750

751 **Figure 5.** A simplified model of the T6P-auxin signaling pathway regulating embryo  
752 maturation in pea. (1) During the transition from early pattern formation to seed filling,  
753 maternally delivered sucrose accumulates in the embryo, raising the level of T6P. (2) Activation  
754 of T6P signaling is required for the expression of *TAR2* and for the increased synthesis of 4-Cl-  
755 IAA from 4-Cl-Trp. (3) A rise in the level of 4-Cl-IAA derepresses auxin responsive genes by  
756 promoting the ubiquitin-mediated release of the AUX/IAA repressor from ARF via the  
757 activation of the Aux/IAA-SCF<sup>TIR1</sup> co-receptor system. (4) The transcriptional activation of  
758 starch synthesis genes, in particular *AGPL*, is necessary for normal starch accumulation, while  
759 certain as yet unidentified target genes regulate cotyledon growth via the stimulation of cell  
760 proliferation. Together, these processes act to efficiently allocate the incoming sucrose within  
761 the differentiating embryo, and to ensure continuous growth and optimal filling of the maturing  
762 seed. 4-Cl-IAA, 4-Cl-indole-3-acetic acid; 4-Cl-Trp, 4-Cl-tryptophan; ADPG, ADP-glucose;  
763 AGP, ADPG pyrophosphorylase; ARE, auxin responsive element; ARF, auxin response factor;  
764 F6P, fructose 6-phosphate; Fru, fructose; G1P, glucose 1-phosphate; G6P, glucose 6-phosphate;  
765 Suc, sucrose; T6P, trehalose 6-phosphate; TPP, T6P phosphatase, TPS, T6P synthase; Tre,  
766 trehalose; Ub, ubiquitin.

767 **Table 1.** The effect on seed weight and starch content by introducing either the *tar2-1* mutant  
 768 allele (experiment 1) or the *USP::TAR2* transgene (experiment 2) into *USP::TPP* plants.

|                                          | Starch                      | Seed weight |
|------------------------------------------|-----------------------------|-------------|
| Experiment 1                             | <i>mg g<sup>-1</sup> DW</i> | <i>mg</i>   |
| <i>TAR2</i>                              | 438 ± 8 a                   | 335 ± 23 a  |
| <i>tar2-1</i>                            | 311 ± 16 b                  | 155 ± 10 c  |
| Empty vector / <i>TAR2</i>               | 422 ± 15 a                  | 323 ± 11a   |
| Empty vector / <i>tar2-1</i>             | 340 ± 17 b                  | 129 ± 9 c   |
| <i>USP::TPP #1</i> / <i>TAR2</i>         | 356 ± 10 b                  | 212 ± 7 b   |
| <i>USP::TPP #1</i> / <i>tar2-1</i>       | 348 ± 3 b                   | 148 ± 7 c   |
| <i>usp::tpp #1</i> / <i>TAR2</i>         | 433 ± 12 a                  | 313 ± 10 a  |
| <i>usp::tpp #1</i> / <i>tar2-1</i>       | 336 ± 13 b                  | 139 ± 7 c   |
| <i>USP::TPP #2</i> / <i>TAR2</i>         | 350 ± 10 b                  | 203 ± 11 b  |
| <i>USP::TPP #2</i> / <i>tar2-1</i>       | 349 ± 9 b                   | 151 ± 6 c   |
| <i>usp::tpp #2</i> / <i>TAR2</i>         | 429 ± 10 a                  | 312 ± 8 a   |
| <i>usp::tpp #2</i> / <i>tar2-1</i>       | 342 ± 5 b                   | 150 ± 7 c   |
| Experiment 2                             |                             |             |
| Empty vector                             | 497 ± 12 a                  | 298 ± 3 a   |
| <i>USP::TPP #2</i>                       | 397 ± 23 b                  | 193 ± 14 b  |
| <i>USP::TPP #3</i>                       | 384 ± 8 b                   | 199 ± 12 b  |
| <i>USP::TAR2 #3</i>                      | 466 ± 22 a                  | 320 ± 8 a   |
| <i>USP::TAR2 #5</i>                      | 521 ± 23 a                  | 306 ± 6 a   |
| <i>USP::TPP #2</i> / <i>USP::TAR2 #3</i> | 507 ± 13 a                  | 306 ± 18 a  |
| <i>USP::TPP #3</i> / <i>USP::TAR2 #3</i> | 482 ± 21 a                  | 277 ± 5 a   |
| <i>USP::TPP #3</i> / <i>USP::TAR2 #5</i> | 497 ± 30 a                  | 312 ± 7 a   |

Values are means ± SEM (n=5). Means labeled with the same letter (a-c) do not differ from one another ( $P \leq 0.01$ ).

769

770

771

772

773

774

775

776

777

778 **Supplementary Information for**

779

780 **Trehalose 6-phosphate Controls Seed Filling by Inducing Auxin**

781 **Biosynthesis**

782

783 Tobias Meitzel\*, Ruslana Radchuk, Erin L. McAdam, Ina Thormählen, Regina Feil, Eberhard

784 Munz, Alexander Hilo, Peter Geigenberger, John J. Ross, John E. Lunn, Ljudmilla Borisjuk

785

786

787

788

789 **\*Correspondence:** Tobias Meitzel (meitzel@ipk-gatersleben.de)

790

791

792

793

794 **This PDF file includes:**

795

796 Supplemental Figures 1 to 4

797 Supplemental Tables 1 to 9

798

799

800

801

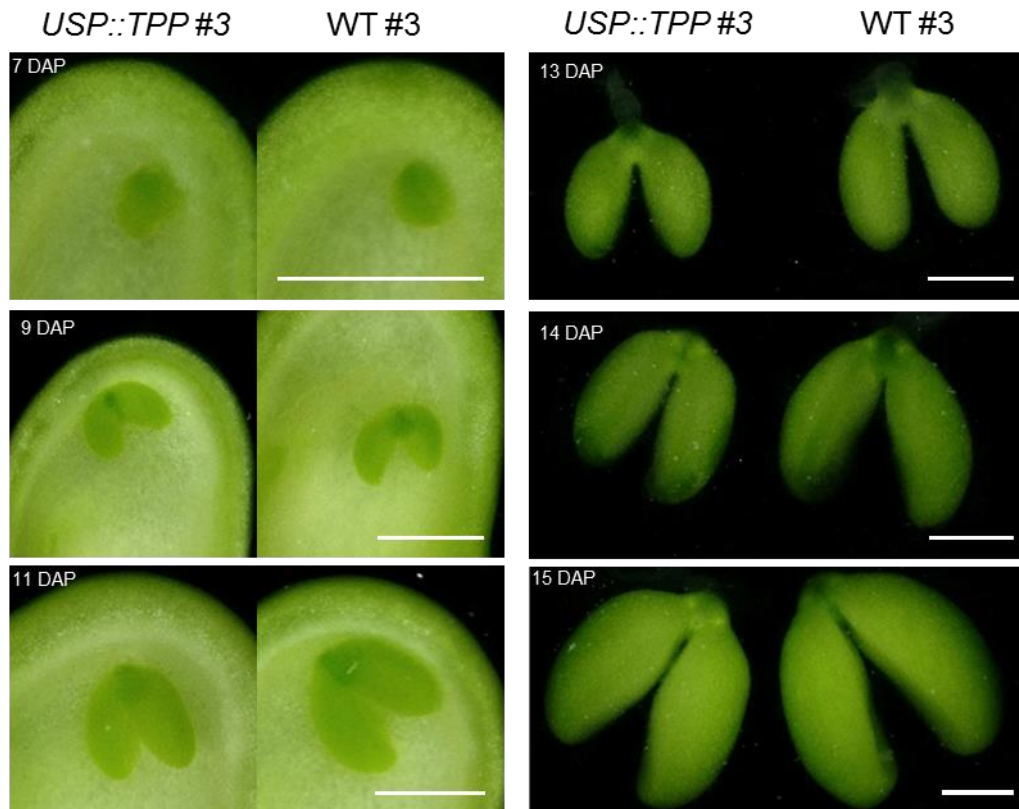

802

803 **Supplemental Figure 1.** Early development of *USP::TPP* embryos. The photographs present  
804 embryos formed by the transgenic line *USP::TPP#3* and *WT#3*, harvested at 7, 9, 11, 13, 14,  
805 and 15 days after pollination (DAP). Note the reduced length of transgenic cotyledons in  
806 embryos harvested later than 11 DAP. Scale bars: 1 mm.

807

808

809

810

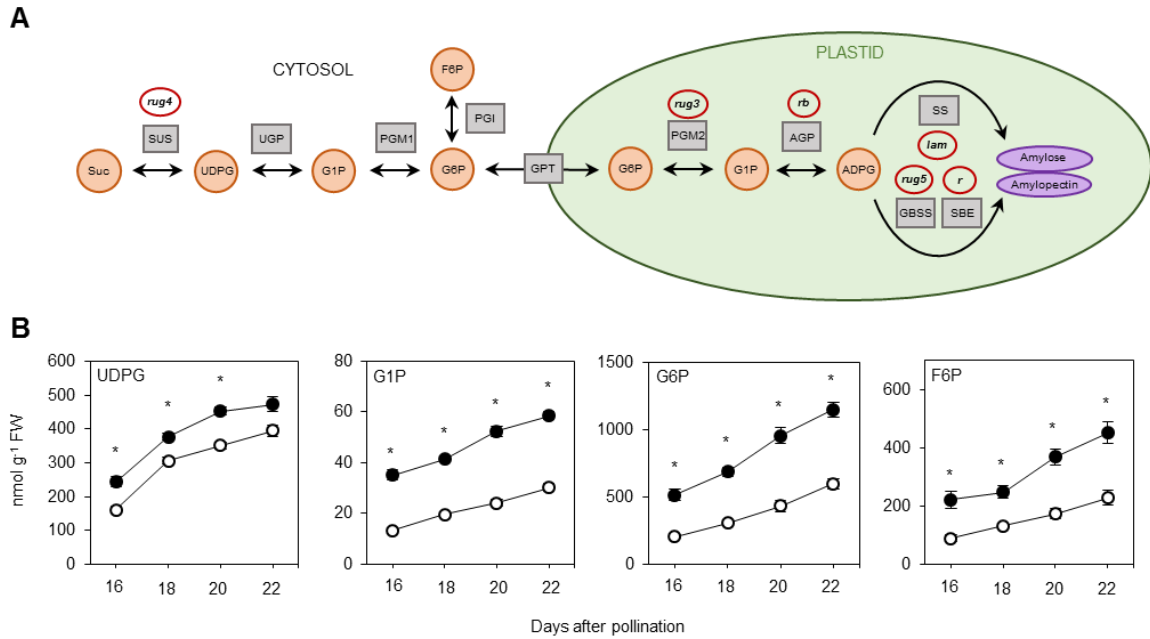

811

812 **Supplemental Figure 2.** Analysis of phosphorylated intermediates directly involved in the  
813 sucrose-to-starch conversion. (A) Overview of the starch biosynthetic pathway in storage cells  
814 of pea embryos. Squares and circles symbolize enzyme activities and metabolites, respectively.  
815 Mutations affecting the corresponding enzyme activities are indicated by red rings. (B) Soluble  
816 sugar levels of developing *USP::TPP* (solid circles) and WT (open circles) embryos at 16, 18,  
817 20, and 22 DAP. Error bars, SEM (n=25); significance was calculated according to Student's t-  
818 test: \* $P \leq 0.001$ . ADPG, ADP-glucose; AGP, ADP-glucose pyrophosphorylase; F6P, fructose  
819 6-phosphate; G1P, glucose 1-phosphate; G6P, glucose 6-phosphate; GBSS, granule-bound  
820 starch synthase; GPT, glucose 6-phosphate/phosphate translocator; PGI,  
821 phosphoglucosomerase; PGM, phosphoglucomutase; SBE, starch branching enzyme; Suc,  
822 sucrose; SUS, sucrose synthase; SS, starch synthase; UDPG, UDP-glucose; UGP, UDP-glucose  
823 pyrophosphorylase.

824

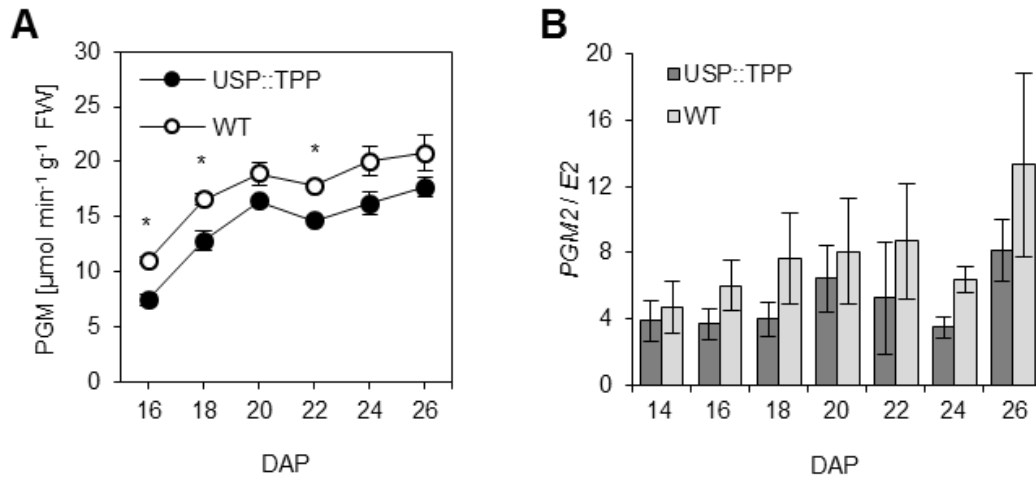

825

826 **Supplemental Figure 3.** The effect of heterologous TPP expression on PGM activity. (A)  
827 Level of total PGM activity in maturing *USP::TPP* and WT embryos. Values are means  $\pm$  SEM  
828 (n=25), \*  $P \leq 0.05$  (Student's t-test). (B) Relative abundance of PGM2 transcripts in *USP::TPP*  
829 and WT embryos over a period from 14 to 26 DAP. Values given as means  $\pm$  SEM (n=10).

830

831



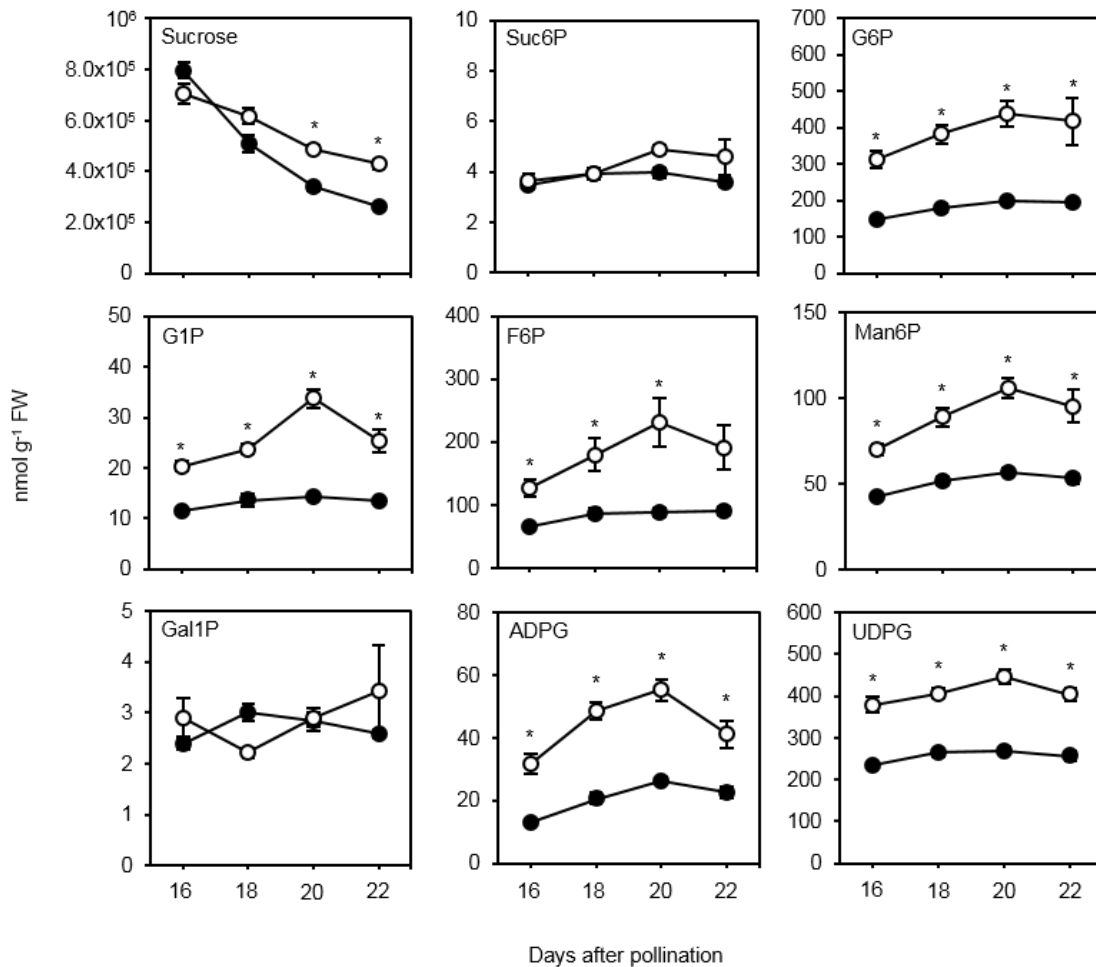

832

833

834 **Supplemental Figure 4.** Heterologous expression of TPS in pea embryos affects sucrose and  
 835 sugar phosphate concentrations. Soluble sugar levels of developing *USP::TPS* (solid circles)  
 836 and WT (open circles) embryos at 16, 18, 20, and 22 DAP. Error bars, SEM (n=15); significance  
 837 was calculated according to Student's t-test: \*P ≤ 0.001. ADPG, ADP-glucose; F6P, fructose  
 838 6-phosphate; G1P, glucose 1-phosphate; G6P, glucose 6-phosphate; Gal1P, galactose 1-  
 839 phosphate; Man6P, mannose 6-phosphate; Suc6P, sucrose 6'-phosphate; UDPG, UDP-glucose.

840

841

842 **Supplemental Table 1.** TPP activity and T6P content in 16-day-old embryos of five  
843 homozygous *USP::TPP* and their corresponding WT lines.

844

| Plant line         | TPP activity                                           | T6P content                    |
|--------------------|--------------------------------------------------------|--------------------------------|
|                    | $\mu\text{mol g}^{-1} \text{FW} \cdot \text{min}^{-1}$ | $\text{nmol g}^{-1} \text{FW}$ |
| <i>USP::TPP</i> #1 | 0.41 ± 0.02                                            | 0.70 ± 0.04*                   |
| WT #1              | ND                                                     | 2.50 ± 0.17                    |
| <i>USP::TPP</i> #2 | 0.54 ± 0.02                                            | 0.67 ± 0.04*                   |
| WT #2              | ND                                                     | 2.24 ± 0.17                    |
| <i>USP::TPP</i> #3 | 0.43 ± 0.04                                            | 0.93 ± 0.07*                   |
| WT #3              | ND                                                     | 2.96 ± 0.11                    |
| <i>USP::TPP</i> #5 | 0.49 ± 0.04                                            | 0.74 ± 0.04*                   |
| WT #5              | ND                                                     | 2.07 ± 0.12                    |
| <i>USP::TPP</i> #6 | 0.54 ± 0.02                                            | 0.62 ± 0.01*                   |
| WT #6              | ND                                                     | 2.99 ± 0.19                    |

Values given as means ± SEM ( $n=5$ ). \* $P \leq 0.001$  (Student's *t*-test)  
ND, not detectable

845

846

847 **Supplemental Table 2.** Compositional analysis of mature seeds harvested from transgenic  
848 *USP::TPP* and corresponding WT plants.

849

|                                   | USP::TPP     | WT          |
|-----------------------------------|--------------|-------------|
| Seed weight (mg)                  | 199 ± 5*     | 319 ± 7     |
| Starch (mg g <sup>-1</sup> DW)    | 348 ± 3*     | 435 ± 4     |
| Starch (mg per seed)              | 69.2 ± 2.0*  | 139 ± 3     |
| Sucrose (μmol g <sup>-1</sup> DW) | 84.8 ± 6.7*  | 64.8 ± 2.0  |
| Total N (%)                       | 4.6 ± 0.1*   | 4.0 ± 0.07  |
| Total C (%)                       | 44.2 ± 0.04* | 44.5 ± 0.01 |
| C/N ratio                         | 9.7 ± 0.2*   | 11.1 ± 0.3  |

Values given as means ± SEM (*n*=5). \**P* ≤ 0.05 (Student's *t*-test)

850

851

852

853 **Supplemental Table 3.** The T6P content of 16-day-old *USP::TPS* and the corresponding WT  
854 embryos.

855

|                               | USP::TPP         | WT              |
|-------------------------------|------------------|-----------------|
| Cell area ( $\mu\text{m}^2$ ) | 7.93 $\pm$ 0.84* | 9.3 $\pm$ 0.68  |
| Cotyledon length (mm)         | 5.23 $\pm$ 0.37* | 6.77 $\pm$ 0.22 |
| Cotyledon width (mm)          | 2.83 $\pm$ 0.08* | 2.62 $\pm$ 0.05 |
| Cotyledon length/width ratio  | 1.86 $\pm$ 0.16* | 2.59 $\pm$ 0.12 |

Values given as means  $\pm$  SEM ( $n=5$ ). \* $P \leq 0.05$  (Student's *t*-test)

856

857

858

859 **Supplemental Table 4.** The level of soluble sugars in 24 DAP embryos harvested from *r*, *rb*,  
860 and *rug4* mutant plants.

861

862

|      | <i>r</i>                      | <i>R</i>   | <i>rb</i>   | <i>Rb</i>  | <i>rug4</i> | <i>RUG4</i> |
|------|-------------------------------|------------|-------------|------------|-------------|-------------|
|      | <i>nmol g<sup>-1</sup> FW</i> |            |             |            |             |             |
| ADPG | 182 ± 17*                     | 35.2 ± 3.1 | 9.1 ± 0.4*  | 15.5 ± 1.6 | 5.5 ± 0.7*  | 23.6 ± 2.2  |
| UDPG | 193 ± 16*                     | 241 ± 27   | 204 ± 6*    | 135 ± 18   | 25.6 ± 3.2* | 193 ± 12    |
| G6P  | 1185 ± 44*                    | 320 ± 13   | 931 ± 27*   | 220 ± 10   | 184 ± 3*    | 253 ± 5     |
| G1P  | 69.8 ± 2.3*                   | 23.7 ± 0.6 | 55.2 ± 1.4* | 18.2 ± 1.0 | 13.0 ± 0.4* | 19.7 ± 0.5  |
| F6P  | 329 ± 16*                     | 116 ± 8    | 290 ± 6*    | 78.2 ± 7.0 | 59.0 ± 2.5* | 80.5 ± 5.6  |

Values given as means ± SEM (*n*=5). \**P* ≤ 0.05 (Student's *t*-test)

ADPG, ADP-glucose; F6P, fructose 6-phosphate; G1P, glucose 1-phosphate; G6P, glucose 6-phosphate; UDPG, UDP-glucose

863

864

865 **Supplemental Table 5.** The extent of AGP monomerization in 18-, 22-, and 26-day-old DAP  
866 embryos, harvested from plants harboring the *USP::TPP* transgene.

867

| Plant line         | AGP monomerisation (%) |         |        |
|--------------------|------------------------|---------|--------|
|                    | 18 DAP                 | 22 DAP  | 26 DAP |
| <i>USP::TPP</i> #1 | 45 ± 0                 | 25 ± 1  | 41 ± 1 |
| WT #1              | 41 ± 1                 | 29 ± 3  | 42 ± 1 |
| <i>USP::TPP</i> #2 | 58 ± 6                 | 31 ± 2  | 34 ± 2 |
| WT #2              | 49 ± 1                 | 27 ± 1  | 32 ± 3 |
| <i>USP::TPP</i> #3 | 41 ± 1                 | 13 ± 2  | 31 ± 2 |
| WT #3              | 39 ± 0                 | 20 ± 4  | 36 ± 5 |
| <i>USP::TPP</i> #5 | 58 ± 0                 | 16 ± 3* | 38 ± 3 |
| WT #5              | 53 ± 3                 | 30 ± 4  | 40 ± 2 |
| <i>USP::TPP</i> #6 | 54 ± 3                 | 13 ± 3* | 27 ± 3 |
| WT #6              | 44 ± 2                 | 30 ± 4  | 32 ± 3 |

Values given as means ± SEM ( $n=5$ ). \* $P \leq 0.05$  (Student's *t*-test)

868

869



870 **Supplemental Table 6.** TPP activities in 26-day-old embryos formed by hybrids between  
871 *USP::TPP* and *USP::TAR2* plants.

872

| Plant line                               | TPP activity                                           |
|------------------------------------------|--------------------------------------------------------|
|                                          | $\mu\text{mol g}^{-1} \text{FW} \cdot \text{min}^{-1}$ |
| Empty vector                             | ND                                                     |
| <i>USP::TPP</i> #2                       | 0.15 $\pm$ 0.03                                        |
| <i>USP::TPP</i> #3                       | 0.17 $\pm$ 0.03                                        |
| <i>USP::TAR2</i> #3                      | ND                                                     |
| <i>USP::TAR2</i> #5                      | ND                                                     |
| <i>USP::TPP</i> #2 / <i>USP::TAR2</i> #3 | 0.17 $\pm$ 0.02                                        |
| <i>USP::TPP</i> #3 / <i>USP::TAR2</i> #3 | 0.14 $\pm$ 0.02                                        |
| <i>USP::TPP</i> #3 / <i>USP::TAR2</i> #5 | 0.14 $\pm$ 0.03                                        |

Values given as means  $\pm$  SEM ( $n=3$ ). ND, not detectable

873

874

875 **Supplemental Table 7.** The T6P content of 16-day-old *USP::TPS* and the corresponding WT  
876 embryos.

877

| Plant line          | T6P content                   |   |      |
|---------------------|-------------------------------|---|------|
|                     | <i>nmol g<sup>-1</sup> FW</i> |   |      |
| <i>USP::TPS</i> #10 | 66.2                          | ± | 1.5* |
| WT #10              | 2.25                          | ± | 0.12 |
| <i>USP::TPS</i> #13 | 64.6                          | ± | 0.8* |
| WT #13              | 2.25                          | ± | 0.12 |
| <i>USP::TPS</i> #14 | 67.7                          | ± | 6.7* |
| WT #14              | 1.42                          | ± | 0.17 |

Values given as means ± SEM (*n*=5). \**P* ≤ 0.001 (Student's *t*-test)

878

879

880

881 **Supplemental Table 8.** Compositional analysis of mature seeds harvested from transgenic  
882 *USP::TPS* and corresponding WT plants.

883

|                                   | USP::TPS    | WT         |
|-----------------------------------|-------------|------------|
| Seed weight (mg)                  | 325 ± 4     | 321 ± 8    |
| Starch (mg g <sup>-1</sup> DW)    | 437 ± 8     | 460 ± 6    |
| Sucrose (μmol g <sup>-1</sup> DW) | 45.5 ± 2.9* | 76.2 ± 5.1 |
| Total N (%)                       | 3.7 ± 0.1   | 3.4 ± 0.1  |
| Total C (%)                       | 44.5 ± 0.0* | 44.2 ± 0.0 |
| C/N ratio                         | 12.0 ± 0.3  | 13.2 ± 0.4 |

Values given as means ± SEM (*n*=5). \**P* ≤ 0.001 (Student's t-test)

884

885

886

887 **Supplemental Table 9.** Oligonucleotides sequences employed.

888

| Gene                                        | Oligo ID  | Sequence (5'→3')                 |
|---------------------------------------------|-----------|----------------------------------|
| <b>Oligonucleotides used for cloning</b>    |           |                                  |
| <b><i>otsA</i></b>                          | otsA-fwd  | TATCTAGAATGAGTCGTTTAGTCGTAGTATCT |
|                                             | otsA-rev  | TATCTAGACTACGCAAGCTTTGGAAAGGTAGC |
| <b><i>otsB</i></b>                          | otsB-fwd  | TATCTAGAATGACAGAACCGTTAACCGAAACC |
|                                             | otsB-rev  | TATCTAGATTAGATACTACGACTAAACGACTC |
| <b><i>uidA</i></b>                          | GUS-fwd   | TATCTAGAATGGTCCGTCCTGTAGAAACCCCA |
|                                             | GUS-rev   | TATCTAGATCATTGTTTGCCTCCCTGCTGCGG |
| <b>Oligonucleotides used for qRT-PCR</b>    |           |                                  |
| <b><i>AGPL</i></b><br>(X96766)              | AGPL-fwd  | TCAAGGTAGACGACAGAGGCAACA         |
|                                             | AGPL-rev  | GGCGACAACCCAAGACGAGAAG           |
| <b><i>AGPS1</i></b><br>(X96764)             | AGPS1-fwd | GCCGCGCAGCAGAGTCCT               |
|                                             | AGPS1-rev | GTCACCCGCCAGAACCAAGTATT          |
| <b><i>AGPS2</i></b><br>(X96765)             | AGPS2-fwd | TGGGGGCAGATTATTACGAGACAG         |
|                                             | AGPS2-rev | ATGCGAGTTTTTGCCGATACCA           |
| <b><i>TAR2</i></b><br>(JN990989)            | TAR2-fwd  | GCATAGGGTGGGCTCTTGTGAA           |
|                                             | TAR2-rev  | GCCCTGAGCTGTGAATCTTTTGA          |
| <b><i>E2</i></b>                            | H1-fwd    | ACTTGCCCTGTCCGTCTTGTA            |
|                                             | H1-rev    | CAAACATCAACAGCAACGGTAGCA         |
| <b><i>PLC 8th intron</i></b><br>(AF280748)  | PPC8i-fwd | AGCACTTGTGAGACTGTTTTTAGCT        |
|                                             | PPC8i-rev | TTTGGAACTTCGGATAAACATATTAG       |
| <b>Oligonucleotides used for genotyping</b> |           |                                  |
| <b>USP::pBar<br/>binary vector</b>          | USP-fwd   | GCAATACTTTCATTCAACACACTCACTA     |
|                                             | ocs-rev   | GCACAACAGAATTGAAAGCAAATATCA      |

GenBank ID numbers are given in parentheses.

889

890

891

892
